# Supplementary material for: Standardised criteria for classifying the International Classification of Activities for Time-use Statistics (ICATUS) activity groups into sleep, sedentary behaviour, and physical activity
Source: Int J Behav Nutr Phys Act. 2019 Nov 14;16:106. doi: 10.1186/s12966-019-0875-5 (PMC6857154; doi:10.1186/s12966-019-0875-5)
Supplement: Supplementary file 1 — Additional file 1. ICATUS Assessment and Harmonisation Tables. The full assessment and harmonisation tables of ICATUS activities. [file 12966_2019_875_MOESM1_ESM.xlsx]

## Sheet: 01 employment
ICATUS 2005				ICATUS 2016		Summary METs	Wakefulness (Yes/No)	Sitting/reclining/lying (Yes/No)	Compendium
Code			Description	Code	Description				Code	Major heading: specific activities	METs
0111			Working time in "formal sector" employment			n/a	yes	n/a
	01111	011110	Working time in main job			n/a	yes	n/a
	01112	011120	Working time in other jobs			n/a	yes	n/a
	01113	011130	Working time as apprentice, intern and related positions			n/a	yes	n/a
	01114	011140	Short breaks and interruptions from work			1.3	yes	yes	07024	Inactivity quiet/light: sitting, smoking	1.3
									07060	Inactivity quiet/light: reclining, talking or talking on phone	1.3
									09030	Miscellaneous: sitting, reading, book, newspaper, etc.	1.3
									09050	Miscellaneous: standing, talking in person, on the phone, computer, or text messaging, light effort	1.8
									09055	Miscellaneous: sitting, talking in person, on the phone, computer, or text messaging, light effort	1.5
	01115	011150	Training and studies in relation to work in the "formal sector"			1.8	yes	yes	09065	Miscellaneous: sitting, in class, general, including note-taking or class discussion	1.8
	0111x		Working time in "formal sector" employment n.f.d.			n/a	yes	n/a
0112			Other breaks			1.4	yes	yes
	01121	011210	Idle time before/after work	142	Breaks during working time within employment	1.3	yes	yes	13035	Self care: talking and eating or eating only, standing	2
									07024	Inactivity quiet/light: sitting, smoking	1.3
									07060	Inactivity quiet/light: reclining, talking or talking on phone	1.3
									09025	Miscellaneous: laughing, sitting	1
									09030	Miscellaneous: sitting, reading, book, newspaper, etc.	1.3
									09050	Miscellaneous: standing, talking in person, on the phone, computer, or text messaging, light effort	1.8
									09055	Miscellaneous: sitting, talking in person, on the phone, computer, or text messaging, light effort	1.5
	01122	011220	Lunch break from work			1.5	yes	yes	13030	Self care: eating, sitting	1.5
									13035	Self care: talking and eating or eating only, standing	2
									07024	Inactivity quiet/light: sitting, smoking	1.3
0120			Looking for work/setting up business in the "formal sector"			1.525	yes	yes
	01201	012010	Looking for work in the "formal sector"	160	Seeking employment	1.4	yes	yes	09030	Miscellaneous: sitting, reading, book, newspaper, etc.	1.3
									09040	Miscellaneous: sitting, writing, desk work, typing	1.3
									09050	Miscellaneous: standing, talking in person, on the phone, computer, or text messaging, light effort	1.8
									09055	Miscellaneous: sitting, talking in person, on the phone, computer, or text messaging, light effort	1.5
	01202	012020	Looking for/setting up business in the "formal sector"	170	Setting up a business	1.65	yes	yes	09040	Miscellaneous: sitting, writing, desk work, typing	1.3
									09050	Miscellaneous: standing, talking in person, on the phone, computer, or text messaging, light effort	1.8
									09055	Miscellaneous: sitting, talking in person, on the phone, computer, or text messaging, light effort	1.5
									17161	Walking: walking from house to car or bus, from car or bus to go places, from car or bus to and from the worksite	2.5
0130			Travel related to work in the "formal sector"			n/a	yes	n/a
	01300	013000	Travel related to work in the "formal sector"			n/a	yes	n/a
0190			Work in the "formal sector" n.e.c.			n/a	yes	n/a
	01900	019000	Work in the "formal sector" n.e.c.			n/a	yes	n/a
n.f.d. : Not Further Defined
n.e.c : Not Elsewhere Classified

## Sheet: 02 household primary work
ICATUS 2005				ICATUS 2016		Summary METs	Wakefulness (Yes/No)	Sitting/reclining/lying (Yes/No)	Compendium
Code			Description	Code	Description				Code	Major heading: specific activities	METs
0211			Working time in primary production activities			4.025	yes	no
	02111		Growing of crops and trees; kitchen gardening	121	Growing of crops for the market in household enterprises	3.55	yes	no
				211	Growing crops and kitchen gardening, for own final use
		021111	Land preparation			5.4	yes	no	08030	Lawn and garden: clearing brush/land, undergrowth, or ground, hauling branches, wheelbarrow chores, vigorous effort	6.3
									11475	Occupation: manual or unskilled labor, general, light effort	2.8
									11476	Occupation: manual or unskilled labor, general, moderate effort	4.5
									11477	Occupation: manual or unskilled labor, general, vigorous effort	6.5
		021112	Sowing and planting operations			4.3	yes	no	08135	Lawn and garden: planting, potting, transplanting seedlings or plants, light effort	2
									08140	Lawn and garden: planting seedlings, shrub, stooping, moderate effort	4.3
									08145	Lawn and garden: planting crops or garden, stooping, moderate effort	4.3
									08150	Lawn and garden: planting trees	4.5
		021113	Collecting and preparing organic fertilizer, carrying and spreading organic/chemical fertilizer			3.15	yes	no	08220	Lawn and garden: walking, applying fertilizer or seeding a lawn, push applicator	3
									08250	Lawn and garden: implied walking/standing - picking up yard, light, picking flowers or vegetables	3.3
		021114	Field/garden upkeep			3.9	yes	no	08210	Lawn and garden: trimming shrubs or trees, manual cutter	4
									08215	Lawn and garden: trimming shrubs or trees, power cutter, using leaf blower, edge, moderate effort	3.5
									08230	Lawn and garden: watering lawn or garden, standing or walking	1.5
									08239	Lawn and garden: weeding, cultivating garden, light-to-moderate effort	3.5
									08240	Lawn and garden: weeding, cultivating garden (Taylor Code 580)	4.5
									08241	Lawn and garden: weeding, cultivating garden, using a hoe, moderate-to-vigorous effort	5
									08245	Lawn and garden: gardening, general, moderate effort	3.8
									08060	Lawn and garden: gardening with heavy power tools, tilling a garden, chain saw	5.8
									08065	Lawn and garden: gardening, using containers, older adults > 60 years	2.3
									08260	Lawn and garden: yard work, general, light effort	3
									08261	Lawn and garden: yard work, general, moderate effort	4
									08262	Lawn and garden: yard work, general, vigorous effort	6
		021115	Harvesting			3.55	yes	no	11146	Occupation: farming, moderate effort (e.g. feeding animals, chasing cattle by walking and/or horseback, spreading manure, harvesting crops)	4.8
									11170	Occupation: farming, driving tasks (e.g. driving tractor or havester)	2.8
									11195	Occupation: farming, rice, planting, grain milling activities	3.8
									18025	Water activities: canoeing, harvesting wild rice, knocking rice off the stalks	3.3
		021116	Post-harvest activities			3.5	yes	no	11195	Occupation: farming, rice, planting, grain milling activities	3.8
									11610	Occupation: standing, light/moderate effort (e.g. assemble/repair heavy parts, welding, stocking parts, auto repair, standing, packing boxes, nursing patient care)	3
									11620	Occupation: standing, moderate effort, intermittent lifting 50 lbs, hitch/twisting ropes	3.5
		021117	Other agricultural service activities			3.5	yes	no	08070	Lawn and garden: irrigation channels, opening and closing ports	4
									11610	Occupation: standing, light/moderate effort (e.g. assemble/repair heavy parts, welding, stocking parts, auto repair, standing, packing boxes, nursing patient care)	3
		021119	Other specified activities related to growing of crops and trees			3.55	yes	no
		02111x	Growing of crops and trees; kitchen gardening n.f.d.			3.55	yes	no
	02112		Farming of animals; production of animal products; animal husbandry services	122	Raising animals for the market in household enterprises	4.3	yes	no
				125	Aquaculture for the market in household enterprises
				212	Farming of animals and production of animal products, for own final use
				217	Aquaculture, for own final use
		021121	Fodder collection; preparation of feed; feeding, watering; grazing			4.3	yes	no	11191	Occupation: farming, hauling water for animals, general hauling water, farming, general hauling water	4.3
									11146	Occupation: farming, moderate effort (e.g. feeding animals, chasing cattle by walking and/or horseback, spreading manure, harvesting crops)	4.8
									11147	Occupation: farming, light effort (e.g. cleaning animal sheds, preparing animal feed)	2
									11180	Occupation: farming, feeding small animals	3.5
									11190	Occupation: farming, feeding cattle, horses	4.3
									11380	Occupation: horse grooming, including feeding, cleaning stalls, bathing, brushing, clipping, longeing and exercising horses	7.3
									11381	Occupation: horse, feeding, watering, cleaning stalls, implied walking and lifting loads	4.3
		021122	Grooming, shoeing, cleaning; veterinary care			4.5	yes	no	11145	Occupation: farming, vigorous effort (e.g. baling hay, cleaning barn)	7.8
									11146	Occupation: farming, moderate effort (e.g. feeding animals, chasing cattle by walking and/or horseback, spreading manure, harvesting crops)	4.8
									11147	Occupation: farming, light effort (e.g. cleaning animal sheds, preparing animal feed)	2
									11192	Occupation: farming, taking care of animals (e.g. grooming, brushing, shearing sheep, assisting with birthing, medical care, branding), general	4.5
									11380	Occupation: horse grooming, including feeding, cleaning stalls, bathing, brushing, clipping, longeing and exercising horses	7.3
									11381	Occupation: horse, feeding, watering, cleaning stalls, implied walking and lifting loads	4.3
									05197	Home activities: animal care, household animals, general	2.3
		021123	Washing shed, coop cleaning			4.8	yes	no	11145	Occupation: farming, vigorous effort (e.g. baling hay, cleaning barn)	7.8
									11146	Occupation: farming, moderate effort (e.g. feeding animals, chasing cattle by walking and/or horseback, spreading manure, harvesting crops)	4.8
									11147	Occupation: farming, light effort (e.g. cleaning animal sheds, preparing animal feed)	2
									11380	Occupation: horse grooming, including feeding, cleaning stalls, bathing, brushing, clipping, longeing and exercising horses	7.3
									11381	Occupation: horse, feeding, watering, cleaning stalls, implied walking and lifting loads	4.3
		021124	Work related to breeding; hatching			4.65	yes	no	11145	Occupation: farming, vigorous effort (e.g. baling hay, cleaning barn)	7.8
									11146	Occupation: farming, moderate effort (e.g. feeding animals, chasing cattle by walking and/or horseback, spreading manure, harvesting crops)	4.8
									11147	Occupation: farming, light effort (e.g. cleaning animal sheds, preparing animal feed)	2
									11192	Occupation: farming, taking care of animals (e.g. grooming, brushing, shearing sheep, assisting with birthing, medical care, branding), general	4.5
		021125	Milking and processing of raw milk			2.4	yes	no	11210	Occupation: farming, milking by hand, cleaning pails, moderate effort	3.5
									11220	Occupation: farming, milking by machine, light effort	1.3
		021126	Collecting, storing, grading of eggs			3.3	yes	no	08250	Lawn and garden: implied walking/standing - picking up yard, light, picking flowers or vegetables	3.3
		021127	Shearing, producing hides and skins from ranching			4	yes	no	11192	Occupation: farming, taking care of animals (e.g. grooming, brushing, shearing sheep, assisting with birthing, medical care, branding), general	4.5
									05046	Home activities: cutting and smoking fish, drying fish or meat	2.3
									05048	Home activities: tanning hides, general	4
		021128	Dung-gathering and making dung cakes			4.3	yes	no	11381	Occupation: horse, feeding, watering, cleaning stalls, implied walking and lifting loads	4.3
		021129	Other specified activities related to animal farming, production of animal products, animal husbandry services			4.3	yes	no
		02112x	Farming of animals; production of animal products; animal husbandry services n.f.d.			4.3	yes	no
	02113		Hunting, trapping and production of animal skins	213	Hunting, trapping and production of animal skins, for own final use	3.3	yes	no
		021131	Hunting and trapping wild animals			2.5	yes	no	04070	Fishing and hunting: hunting, bow and arrow, or crossbow	2.5
									04080	Fishing and hunting: hunting, deer, elk, large game (Taylor 170)	6
									04085	Fishing and hunting: hunting large game, from a hunting stand, limited walking	2.5
									04086	Fishing and hunting: hunting large game from a car, plane, or boat	2
									04090	Fishing and hunting: hunting, duck, wading	2.5
									04095	Fishing and hunting: hunting, flying fox, squirrel	3
									04100	Fishing and hunting: hunting, general	5
									04110	Fishing and hunting: hunting, pheasants or grouse (Taylor Code 680)	6
									04120	Fishing and hunting: hunting, rabbit, squirrel, prairie chick, raccoon, small game (Taylor Code 690)	5
									04123	Fishing and hunting: hunting, pigs, wild	3.3
									04124	Fishing and hunting: trapping game, general	2
									04125	Fishing and hunting: hunting, hiking with hunting gear	9.5
									04130	Fishing and hunting: pistol shooting or trap shooting, standing	2.5
									04140	Fishing and hunting: rifle exercises, shooting, lying down	2.3
									04145	Fishing and hunting: rifle exercises, shooting, kneeling or standing	2.5
		021132	Hunting birds			3.3	yes	no	04115	Fishing and hunting: hunting, birds	3.3
		021133	Production of fur skins, reptile or bird skins from hunting and trapping			3.5	yes	no	05044	Home activities: butchering animals, small	3
									05045	Home activities: butchering animals, large, vigorous effort	6
									05046	Home activities: cutting and smoking fish, drying fish or meat	2.3
									05048	Home activities: tanning hides, general	4
		021139	Other specified activities related to hunting and production of animal skins			3.3	yes	no
		02113x	Hunting, trapping and production of animal skins n.f.d.			3.3	yes	no
	02114		Gathering of wild products, woodcutting, gathering firewood and other forestry activities	123	Forestry and logging for the market in household enterprises	3.9	yes	no
		021141	Gathering medicinal and other plants for craft production or fuel	214	Forestry and logging, for own final use	3.5	yes	no	08019	Lawn and garden: chopping wood, splitting logs, moderate effort	4.5
				241	Gathering firewood and other natural products used as fuel for own final use				08025	Lawn and garden: clearing light brush, thinning garden, moderate effort	3.5
									08210	Lawn and garden: trimming shrubs or trees, manual cutter	4
									08215	Lawn and garden: trimming shrubs or trees, power cutter, using leaf blower, edge, moderate effort	3.5
									08250	Lawn and garden: implied walking/standing - picking up yard, light, picking flowers or vegetables	3.3
		021142	Gathering wild fruits, berries or other uncultivated crops, other edible food			3.5	yes	no	08246	Lawn and garden: picking fruit off trees, picking fruits/vegetables, moderate effort	3.5
									08248	Lawn and garden: picking fruit off trees, gleaning fruits, picking fruits/vegetables, climbing ladder to pick fruit, vigorous effort	4.5
									08250	Lawn and garden: implied walking/standing - picking up yard, light, picking flowers or vegetables	3.3
		021143	Woodcutting and gathering firewood			5.3	yes	no	08019	Lawn and garden: chopping wood, splitting logs, moderate effort	4.5
									08020	Lawn and garden: chopping wood, splitting logs, vigorous effort	6.3
									08009	Lawn and garden: carrying, loading or stacking wood, loading/unloading or carrying lumber, light-to-moderate effort	3.3
									08010	Lawn and garden: carrying, loading or stacking wood, loading/unloading or carrying lumber	5.5
									08250	Lawn and garden: implied walking/standing - picking up yard, light, picking flowers or vegetables	3.3
									08057	Lawn and garden: felling trees, large size	8.3
									08058	Lawn and garden: felling trees, small-medium size	5.3
									11264	Occupation: forestry, moderate effort (e.g. sawing wood with power saw, weeding, hoeing)	4.5
									11266	Occupation: forestry, vigorous effort (e.g. barking, felling, or trimming trees, carrying or stacking logs, planting seeds, sawing lumber by hand)	8
		021144	Reforestation, growing forest trees, replanting			4.3	yes	no	08150	Lawn and garden: planting trees	4.5
									08135	Lawn and garden: planting, potting, transplanting seedings or plants, light effort	2
									08140	Lawn and garden: planting seedings, shrub, stooping, moderate effort	4.3
									08145	Lawn and garden: planting crops or garden, stooping, moderate effort	4.3
		021149	Other specified activities related to hunting, forestry, and gathering of wild products			3.9	yes	no
		02114x	Gathering of wild products, woodcutting, gathering firewood and other forestry activities n.f.d.			3.9	yes	no
	02115		Fishing and fish/aquatic farming	124	Fishing for the market in household enterprises	4.15	yes	no
				216	Fishing, for own final use
		021151	Catching fish and gathering other forms of aquatic life			4	yes	no	04001	Fishing and hunting: fishing, general	3.5
									04005	Fishing and hunting: fishing, crab fishing	4.5
									04007	Fishing and hunting: fishing, catching fish with hands	4
									04020	Fishing and hunting: fishing from river bank and walking	4
									04030	Fishing and hunting: fishing from boat or canoe, sitting	2
									04040	Fishing and hunting: fishing from river bank, standing (Taylor Code 660)	3.5
									04050	Fishing and hunting: fishing in stream, in waders (Taylor Code 670)	6
									04083	Fishing and hunting: hunting large marine animals	4
		021152	Gathering marine materials such as natural pearls, sponges, corals, algae, seashells			6	yes	no	18200	Water activities: skindiving, scuba diving, general (Taylor Code 310)	7
									18210	Water activities: snorkeling (Taylor Code 310)	5
									18300	Water activities: swimming, lake, ocean, river (Taylor Codes 280, 295)	6
		021153	Fish/aquatic farming: breeding, rearing			4.65	yes	no	11145	Occupation: farming, vigorous effort (e.g. baling hay, cleaning barn)	7.8
									11146	Occupation: farming, moderate effort (e.g. feeding animals, chasing cattle by walking and/or horseback, spreading manure, harvesting crops)	4.8
									11147	Occupation: farming, light effort (e.g. cleaning animal sheds, preparing animal feed)	2
									11192	Occupation: farming, taking care of animals (e.g. grooming, brushing, shearing sheep, assisting with birthing, medical care, branding), general	4.5
		021154	Fish/aquatic farming: cleaning beds, feeding			4.15	yes	no	11147	Occupation: farming, light effort (e.g. cleaning animal sheds, preparing animal feed)	2
									11180	Occupation: farming, feeding small animals	3.5
									11145	Occupation: farming, vigorous effort (e.g. baling hay, cleaning barn)	7.8
									11146	Occupation: farming, moderate effort (e.g. feeding animals, chasing cattle by walking and/or horseback, spreading manure, harvesting crops)	4.8
		021155	Repair, care and maintenance of fishing boats and equipment, tools, fishnets			3.5	yes	no	06220	Home repair: washing and waxing hull of sailboat or airplane	4.5
									05020	Home activities: cleaning, heavy or major (e.g. wash car, wash windows, clean garage), moderate effort	3.5
									06030	Home repair: automobile repair, light or moderate effort	3.3
		021159	Other specified activities related to fishing, fish/aquatic farming			4.15	yes	no
		02115x	Fishing and fish/aquatic farming n.f.d.			4.15	yes	no
	02116		Mining and quarrying	126	Mining and quarrying for the market in household enterprises	5.5	yes	no
				218	Mining and quarrying, for own final use
		021161	Mining/extraction of salt			5.5	yes	no	11100	Occupation: coal mining, general	5.5
		021162	Drilling well, boring holes etc			5.8	yes	no	11080	Occupation: coal mining, drilling coal, rock	5.3
									11500	Occupation: operating heavy duty equipment, automated, not driving	2.5
									11540	Occupation: shoveling, digging ditches	7.8
									11780	Occupation: using heavy power tools such as pneumatic tools (e.g. jackhammers, drills)	6.3
		021163	Quarrying of stone slabs			5.5	yes	no	11100	Occupation: coal mining, general	5.5
		021164	Crushing and breaking of stones			6	yes	no	11030	Occupation: building road, driving heavy machinery	6
									08030	Lawn and garden: clearing brush/land, undergrowth, or ground, hauling branches, wheelbarrow chores, vigorous effort	6.3
									11050	Occupation: carrying heavy loads (e.g. bricks, tools)	8
									11475	Occupation: manual or unskilled labor, general, light effort	2.8
									11476	Occupation: manual or unskilled labor, general, moderate effort	4.5
									11477	Occupation: manual or unskilled labor, general, vigorous effort	6.5
									11500	Occupation: operating heavy duty equipment, automated, not driving	2.5
		021165	Digging out clay, gravel and sand			5.9	yes	no	11110	Occupation: coal mining, shoveling coal	5.5
									11550	Occupation: shoveling, more than 16 lbs/minute, deep digging, vigorous effort	8.8
									11560	Occupation: shoveling, less than 10 lbs/minute, moderate effort	5
									11570	Occupation: shoveling, 10 to 15 lbs/minute, vigorous effort	6.5
									08040	Lawn and garden: digging sandbox, shoveling sand	5
									11780	Occupation: using heavy power tools such as pneumatic tools (e.g. jackhammers, drills)	6.3
									11790	Occupation: using heavy tools (not power) such as shovel, pick, tunnel bar, spade	8
									11050	Occupation: carrying heavy loads (e.g. bricks, tools)	8
									11475	Occupation: manual or unskilled labor, general, light effort	2.8
									11476	Occupation: manual or unskilled labor, general, moderate effort	4.5
									11477	Occupation: manual or unskilled labor, general, vigorous effort	6.5
									11500	Occupation: operating heavy duty equipment, automated, not driving	2.5
		021166	Gold panning, mining gems etc.			5.5	yes	no	11100	Occupation: coal mining, general	5.5
		021167	Transporting, storing and stocking			3	yes	no	08055	Lawn and garden: driving tractor	2.8
									11050	Occupation: carrying heavy loads (e.g. bricks, tools)	8
									11500	Occupation: operating heavy duty equipment, automated, not driving	2.5
									11766	Occupation: truck driving, loading and unloading truck, tying down load, standing, walking and carrying heavy loads	6.5
									11610	Occupation: standing, light/moderate effort (e.g. assemble/repair heavy parts, welding, stocking parts, auto repair, standing, packing boxes, nursing patient care)	3
		021169	Other specified mining and quarrying activities			5.5	yes	no
		02116x	Mining and quarrying n.f.d.			5.5	yes	no
	02117	021170	Collecting water	242	Fetching water from natural and other sources for own final use	4.3	yes	no	11191	Occupation: farming, hauling water for animals, general hauling water, farming, general hauling water	4.3
	02118	021180	Training and studies in relation to work in primary production activities of households	150	Training and studies in relation to employment	2.4	yes	yes	09065	Miscellaneous: sitting, in class, general, including note-taking or class discussion	1.8
									21020	Volunteer activities: standing, light/moderate work (e.g. pack boxes, assemble/repair, set up chairs/furniture)	3
	0211x		Working time in primary production activities n.f.d.			4.03	yes	no
0212			Working time in primary production activities	129	Other activities related to employment in household enterprises to produce goods	2.025	yes	no
	02121	021210	Purchasing/acquiring inputs/supplies used for primary production activities of households			2.05	yes	no	05060	Home activities: food shopping with or without a grocery cart, standing or walking	2.3
									05065	Home activities: non-food shopping with or without a grocery cart, standing or walking	2.3
									09050	Miscellaneous: standing, talking in person, on the phone, computer, or text messaging, light effort	1.8
									09055	Miscellaneous: sitting, talking in person, on the phone, computer, or text messaging, light effort	1.5
	02122	021220	Selling/disposing of outputs of primary production activities of households			2	yes	no	21005	Volunteer activities: sitting, light office work, in general	1.5
									21015	Volunteer activities: standing, light work (filing, talking, assembling)	2.3
									11791	Occupation: walking on job, less than 2 mph, very slow speed, in office or lab area	2
0220			Looking for work/setting up business in household primary production activities			1.575	yes	yes
	02201	022010	Looking for work in primary production activities in household enterprise			1.5	yes	yes	09030	Miscellaneous: sitting, reading, book, newspaper, etc.	1.3
									09050	Miscellaneous: standing, talking in person, on the phone, computer, or text messaging, light effort	1.8
									09055	Miscellaneous: sitting, talking in person, on the phone, computer, or text messaging, light effort	1.5
	02202	022020	Looking for/setting up business in primary production activities in household enterprise			1.65	yes	yes	09040	Miscellaneous: sitting, writing, desk work, typing	1.3
									09050	Miscellaneous: standing, talking in person, on the phone, computer, or text messaging, light effort	1.8
									09055	Miscellaneous: sitting, talking in person, on the phone, computer, or text messaging, light effort	1.5
									17161	Walking: walking from house to car or bus, from car or bus to go places, from car or bus to and from the worksite	2.5
0230			Travel related to primary production activities of households			n/a	yes	n/a
	02300	023000	Travel related to primary production activities of households			n/a	yes	n/a
0290			Work for households in primary production activities n.e.c.			3.55	yes	no
	02900	029000	Work for households in primary production activities n.e.c.			3.55	yes	no
n.f.d. : Not Further Defined
n.e.c : Not Elsewhere Classified

## Sheet: 03 household non primary work
ICATUS 2005				ICATUS 2016		Summary METs	Wakefulness (Yes/No)	Sitting/reclining/lying (Yes/No)	Compendium
Code			Description	Code	Description				Code	Major heading: specific activities	METs
0311			Working time in non-primary production activities			2.9125	yes	no
	03111		Processing of food products			2.5	yes	no
		031111	Production, processing and preserving of meat and meat products			3	yes	no	05044	Home activities: butchering animals, small	3
									05045	Home activities: butchering animals, large, vigorous effort	6
									05046	Home activities: cutting and smoking fish, drying fish or meat	2.3
									05050	Home activities: cooking or food preparation - standing or sitting or in general (not broken into stand/walk components), manual appliances, light effort	2
									21025	Volunteer activities: standing, moderate (lifting 50 lbs, assembling at fast rate)	3.5
		031112	Making dairy products			2	yes	no	11015	Occupation: bakery, light effort	2
									05050	Home activities: cooking or food preparation - standing or sitting or in general (not broken into stand/walk components), manual appliances, light effort	2
		031113	Processing and preserving of fish and fish products			2.3	yes	no	05046	Home activities: cutting and smoking fish, drying fish or meat	2.3
		031114	Processing and preserving of fruits and vegetables			2.5	yes	no	05050	Home activities: cooking or food preparation - standing or sitting or in general (not broken into stand/walk components), manual appliances, light effort	2
									21020	Volunteer activities: standing, light/moderate work (e.g. pack boxes, assemble/repair, set up chairs/furniture)	3
		031115	Processing grains			2.9	yes	no	11147	Occupation: farming, light effort (e.g. cleaning animal sheds, preparing animal feed)	2
									11195	Occupation: farming, rice, planting, grain milling activities	3.8
		031119	Other specified activities related to processing of food products			2.5	yes	no
		03111x	Processing of food products n.f.d.			2.5	yes	no
	03112		Making of other food products and beverages			2.825	yes	no
		031121	Beer brewing and making of other beverages, wines or spirits			3.25	yes	no	21015	Volunteer activities: standing, light work (filing, talking, assembling)	2.3
									21020	Volunteer activities: standing, light/moderate work (e.g. pack boxes, assemble/repair, set up chairs/furniture)	3
									21055	Volunteer activities: walking, 2.5 mph slowly and carrying objects less than 25 lbs	3.5
									21060	Volunteer activities: walking, 3 mph moderately and carrying objects less than 25 lbs, pushing something	4.5
		031122	Baking bread, cakes, rice cakes, pastries, pies, tarts, biscuits			3	yes	no	11010	Occupation: bakery, general, moderate effort	4
									11015	Occupation: bakery, light effort	2
									05057	Home activities: cooking Indian bread on an outside stove	3
		031123	Making noodles, pasta and similar products			3	yes	no	21025	Volunteer activities: standing, moderate (lifting 50 lbs, assembling at fast rate)	3.5
									21020	Volunteer activities: standing, light/moderate work (e.g. pack boxes, assemble/repair, set up chairs/furniture)	3
									05050	Home activities: cooking or food preparation - standing or sitting or in general (not broken into stand/walk components), manual appliances, light effort	2
		031124	Making candy, boiled sweets, caramel, chocolate, and other sugar confectionery products			2.65	yes	no	05110	Home activities: maple syruping/sugar bushing (including carrying buckets, carrying wood)	5
									05050	Home activities: cooking or food preparation - standing or sitting or in general (not broken into stand/walk components), manual appliances, light effort	2
									21020	Volunteer activities: standing, light/moderate work (e.g. pack boxes, assemble/repair, set up chairs/furniture)	3
									21015	Volunteer activities: standing, light work (filing, talking, assembling)	2.3
		031125	Roasting seeds, nuts			2	yes	no	05050	Home activities: cooking or food preparation - standing or sitting or in general (not broken into stand/walk components), manual appliances, light effort	2
		031126	Roasting, grinding coffee beans			2.15	yes	no	05050	Home activities: cooking or food preparation - standing or sitting or in general (not broken into stand/walk components), manual appliances, light effort	2
									21015	Volunteer activities: standing, light work (filing, talking, assembling)	2.3
		031129	Other specified activities related to making of other food products and beverages			2.83	yes	no
		03112x	Making of other food products and beverages n.f.d.			2.83	yes	no
	03113		Making textiles, wearing apparel, leather and associated products	222	Making, processing textiles, wearing apparel, leather and related products, for own final use	3	yes	yes
		031131	Spinning, weaving, finishing of textiles			3	yes	yes	09075	Miscellaneous: sitting, arts and crafts, carving wood, weaving, spinning wool, light effort	1.8
									09080	Miscellaneous: sitting, arts and crafts, carving wood, weaving, spinning wool, moderate effort	3
									09085	Miscellaneous: standing, arts and crafts, sand painting, carving, weaving, light effort	2.5
									09090	Miscellaneous: standing, arts and crafts, sand painting, carving, weaving, moderate effort	3.3
									09095	Miscellaneous: standing, arts and crafts, sand painting, carving, weaving, vigorous effort	3.5
		031132	Producing articles from textile except apparel			2	yes	yes	09075	Miscellaneous: sitting, arts and crafts, carving wood, weaving, spinning wool, light effort	1.8
									09080	Miscellaneous: sitting, arts and crafts, carving wood, weaving, spinning wool, moderate effort	3
									05080	Home activities: knitting, sewing, light effort, wrapping presents, sitting	1.3
									05082	Home activities: sewing with a machine	2.8
									11740	Occupation: tailoring, hand sewing	1.8
									11763	Occupation: tailoring, weaving, light effort (e.g. finishing operations, washing, dyeing, inspecting cloth, counting yards, paperwork)	2
									11765	Occupation: tailoring, weaving, moderate effort (e.g. spinning and weaving operations, delivering boxes of yam to spinners, loading of warp bean, pinwinding, conewinding, warping, cloth cutting)	4
		031133	Making wearing apparel			2.4	yes	yes	11720	Occupation: tailoring, cutting fabric	2.3
									11730	Occupation: tailoring, general	2.5
									11740	Occupation: tailoring, hand sewing	1.8
									11750	Occupation: tailoring, machine sewing	2.5
									11763	Occupation: tailoring, weaving, light effort (e.g. finishing operations, washing, dyeing, inspecting cloth, counting yards, paperwork)	2
									11765	Occupation: tailoring, weaving, moderate effort (e.g. spinning and weaving operations, delivering boxes of yam to spinners, loading of warp bean, pinwinding, conewinding, warping, cloth cutting)	4
		031134	Curing of skins and production of leather, tanning and dressing of leather			3.5	yes	no	05048	Home activities: tanning hides, general	4
									21020	Volunteer activities: standing, light/moderate work (e.g. pack boxes, assemble/repair, set up chairs/furniture)	3
									21025	Volunteer activities: standing, moderate (lifting 50 lbs, assembling at fast rate)	3.5
		031135	Making shoes, footwear, handbags, luggage			3	yes	yes	11530	Occupation: shoe repair, general	2
									21020	Volunteer activities: standing, light/moderate work (e.g. pack boxes, assemble/repair, set up chairs/furniture)	3
									21025	Volunteer activities: standing, moderate (lifting 50 lbs, assembling at fast rate)	3.5
		031139	Other specified activities related to making textiles, wearing apparel, leather and associated products			3	yes	yes
		03113x	Making textiles, wearing apparel, leather and associated products n.f.d.			3	yes	yes
	03114		Craft-making using all types of materials			3	yes	yes
		031141	Making wood products including furniture, fixtures or furnishings, statuettes and other ornaments	223	Making, processing of wood and bark products, for own final use	3.3	yes	no	06060	Home repair: carpentry, finishing or refinishing cabinets or furniture	3.3
									06070	Home repair: carpentry, sawing hardwood	6
									06072	Home repair: carpentry, home remodeling tasks, moderate effort	4
									06074	Home repair: carpentry, home remodeling tasks, light effort	2.3
									09075	Miscellaneous: sitting, arts and crafts, carving wood, weaving, spinning wool, light effort	1.8
									09080	Miscellaneous: sitting, arts and crafts, carving wood, weaving, spinning wool, moderate effort	3
									09085	Miscellaneous: standing, arts and crafts, sand painting, carving, weaving, light effort	2.5
									09090	Miscellaneous: standing, arts and crafts, sand painting, carving, weaving, moderate effort	3.3
									09095	Miscellaneous: standing, arts and crafts, sand painting, carving, weaving, vigorous effort	3.5
									11475	Occupation: manual or unskilled labor, general, light effort	2.8
									11476	Occupation: manual or unskilled labor, general, moderate effort	4.5
									11477	Occupation: manual or unskilled labor, general, vigorous effort	6.5
		031142	Making baskets, wickerwork and other similar products			3	yes	yes	11763	Occupation: tailoring, weaving, light effort (e.g. finishing operations, washing, dyeing, inspecting cloth, counting yards, paperwork)	2
									11765	Occupation: tailoring, weaving, moderate effort (e.g. spinning and weaving operations, delivering boxes of yam to spinners, loading of warp bean, pinwinding, conewinding, warping, cloth cutting)	4
									09075	Miscellaneous: sitting, arts and crafts, carving wood, weaving, spinning wool, light effort	1.8
									09080	Miscellaneous: sitting, arts and crafts, carving wood, weaving, spinning wool, moderate effort	3
									09085	Miscellaneous: standing, arts and crafts, sand painting, carving, weaving, light effort	2.5
									09090	Miscellaneous: standing, arts and crafts, sand painting, carving, weaving, moderate effort	3.3
									09095	Miscellaneous: standing, arts and crafts, sand painting, carving, weaving, vigorous effort	3.5
		031143	Fabricating utensils, cutlery, hand tools and other metal products			3	yes	no	11430	Occupation: machine tooling (e.g. machining, working sheet metal, machine fitter, operating lathe, welding) light-to-moderate effort	3
									11450	Occupation: machine tooling, operating punch press, moderate effort	5
									09075	Miscellaneous: sitting, arts and crafts, carving wood, weaving, spinning wool, light effort	1.8
									09080	Miscellaneous: sitting, arts and crafts, carving wood, weaving, spinning wool, moderate effort	3
									09085	Miscellaneous: standing, arts and crafts, sand painting, carving, weaving, light effort	2.5
									09090	Miscellaneous: standing, arts and crafts, sand painting, carving, weaving, moderate effort	3.3
									09095	Miscellaneous: standing, arts and crafts, sand painting, carving, weaving, vigorous effort	3.5
		031144	Metal working	226	Making, processing metals and metal products for own final use	4.5	yes	no	11050	Occupation: carrying heavy loads (e.g. bricks, tools)	8
									11430	Occupation: machine tooling (e.g. machining, working sheet metal, machine fitter, operating lathe, welding) light-to-moderate effort	3
									11450	Occupation: machine tooling, operating punch press, moderate effort	5
									06020	Home repair: automobile body work	4
		031145	Making pottery, ovens and cooking stoves, ornaments etc. from clay, plaster or cement			3	yes	yes	09075	Miscellaneous: sitting, arts and crafts, carving wood, weaving, spinning wool, light effort	1.8
									09080	Miscellaneous: sitting, arts and crafts, carving wood, weaving, spinning wool, moderate effort	3
									09085	Miscellaneous: standing, arts and crafts, sand painting, carving, weaving, light effort	2.5
									09090	Miscellaneous: standing, arts and crafts, sand painting, carving, weaving, moderate effort	3.3
									09095	Miscellaneous: standing, arts and crafts, sand painting, carving, weaving, vigorous effort	3.5
		031146	Making paper and paper products; paper crafts			2.05	yes	yes	09075	Miscellaneous: sitting, arts and crafts, carving wood, weaving, spinning wool, light effort	1.8
									21015	Volunteer activities: standing, light work (filing, talking, assembling)	2.3
		031147	Making soap, perfume, candles etc.			3.25	yes	no	21015	Volunteer activities: standing, light work (filing, talking, assembling)	2.3
									21020	Volunteer activities: standing, light/moderate work (e.g. pack boxes, assemble/repair, set up chairs/furniture)	3
									21055	Volunteer activities: walking, 2.5 mph slowly and carrying objects less than 25 lbs	3.5
									21060	Volunteer activities: walking, 3 mph moderately and carrying objects less than 25 lbs, pushing something	4.5
		031149	Other specified activities related to craft-making			3	yes	yes
		03114x	Craft-making using all types of materials n.f.d.			3	yes	yes
	03115	031150	Tobacco preparing and curing			3	yes	no	21015	Volunteer activities: standing, light work (filing, talking, assembling)	2.3
									21020	Volunteer activities: standing, light/moderate work (e.g. pack boxes, assemble/repair, set up chairs/furniture)	3
									21055	Volunteer activities: walking, 2.5 mph slowly and carrying objects less than 25 lbs	3.5
									21060	Volunteer activities: walking, 3 mph moderately and carrying objects less than 25 lbs, pushing something	4.5
									21070	Volunteer activities: walk/stand combination, for volunteer purposes	3
	03116	031160	Making bricks, concrete slabs, hollow blocks, tiles etc.	224	Making, processing bricks, concrete slabs, hollow blocks, tiles for own final use	4.75	yes	no	11430	Occupation: machine tooling (e.g. machining, working sheet metal, machine fitter, operating lathe, welding) light-to-moderate effort	3
									11450	Occupation: machine tooling, operating punch press, moderate effort	5
									11050	Occupation: carrying heavy loads (e.g. bricks, tools)	8
									11475	Occupation: manual or unskilled labor, general, light effort	2.8
									11476	Occupation: manual or unskilled labor, general, moderate effort	4.5
									11477	Occupation: manual or unskilled labor, general, vigorous effort	6.5
	03117	031170	Making herbal and medicinal preparations	225	Making, processing herbal and medicinal preparations for own final use	1.4	yes	yes	07022	Inactivity quiet/light: sitting quietly, fidgeting, general, fidgeting hands	1.5
									07040	Inactivity quiet/light: standing quietly, standing in a line	1.3
	03118	031180	Training and studies in relation to work in non-primary production activities of households			2.4	yes	yes	09065	Miscellaneous: sitting, in class, general, including note-taking or class discussion	1.8
									21020	Volunteer activities: standing, light/moderate work (e.g. pack boxes, assemble/repair, set up chairs/furniture)	3
	0311x		Working time in non-primary production activities n.f.d			2.91	yes	no
0312			Acquiring inputs/supplies and disposing of outputs used for non-primary production activities households	229	Acquiring supplies and disposing of products and other activities related to making and processing goods for own final use	2.025	yes	no
	03121	031210	Purchasing/acquiring inputs/supplies used for non-primary production activities for households			2.05	yes	no	05060	Home activities: food shopping with or without a grocery cart, standing or walking	2.3
									05065	Home activities: non-food shopping with or without a grocery cart, standing or walking	2.3
									09050	Miscellaneous: standing, talking in person, on the phone, computer, or text messaging, light effort	1.8
									09055	Miscellaneous: sitting, talking in person, on the phone, computer, or text messaging, light effort	1.5
	03122	031220	Selling/disposing of outputs of non-primary production activities of households			2	yes	no	21005	Volunteer activities: sitting, light office work, in general	1.5
									21015	Volunteer activities: standing, light work (filing, talking, assembling)	2.3
									11791	Occupation: walking on job, less than 2 mph, very slow speed, in office or lab area	2
0320			Looking for work/setting up business in non-primary production activities in household enterprise			1.575	yes	yes
	03201	032010	Looking for work in non-primary production activities in household enterprise			1.5	yes	yes	09030	Miscellaneous: sitting, reading, book, newspaper, etc.	1.3
									09050	Miscellaneous: standing, talking in person, on the phone, computer, or text messaging, light effort	1.8
									09055	Miscellaneous: sitting, talking in person, on the phone, computer, or text messaging, light effort	1.5
	03202	032020	Looking for/setting up business in non-primary production activities in household enterprise			1.65	yes	yes	09040	Miscellaneous: sitting, writing, desk work, typing	1.3
									09050	Miscellaneous: standing, talking in person, on the phone, computer, or text messaging, light effort	1.8
									09055	Miscellaneous: sitting, talking in person, on the phone, computer, or text messaging, light effort	1.5
									17161	Walking: walking from house to car or bus, from car or bus to go places, from car or bus to and from the worksite	2.5
0330			Travel related to non-primary production of household			n/a	yes	n/a
	03300	033000	Travel related to non-primary production of household			n/a	yes	n/a
0390			Work for household in non-primary production activities n.e.c.			2.5	yes	no
	03900	039000	Work for household in non-primary production activities n.e.c.			2.5	yes	no
n.f.d. : Not Further Defined
n.e.c : Not Elsewhere Classified

## Sheet: 04 household construction
ICATUS 2005				ICATUS 2016		Summary METs	Wakefulness (Yes/No)	Sitting/reclining/lying (Yes/No)	Compendium
Code			Description	Code	Description				Code	Major heading: specific activities	METs
0411			Working time in construction activities			4.4	yes	no
	04111		Construction and repair for own capital formation	230	Construction activities for own final use	4.3	yes	no
		041111	Building of own house			4.3	yes	no	11120	Occupation: construction, outside, remodeling, new structures (e.g. roof repair, miscellaneous)	4
									11475	Occupation: manual or unskilled labor, general, light effort	2.8
									11476	Occupation: manual or unskilled labor, general, moderate effort	4.5
									11477	Occupation: manual or unskilled labor, general, vigorous effort	6.5
									11480	Occupation: masonry, concrete, moderate effort	4.3
									11482	Occupation: masonry, concrete, light effort	2.5
									11516	Occupation: plumbing activities	3
									11038	Occupation: carpentry, general, light effort	2.5
									11040	Occupation: carpentry, general, moderate effort	4.3
									11042	Occupation: carpentry, general, heavy or vigorous effort	7
									06130	Home repair: laying or removing carpet	4.5
									06150	Home repair: painting, outside home (Taylor Code 650)	5
									06160	Home repair: painting inside home, wallpapering, scraping paint	3.3
									06180	Home repair: roofing	6
									06110	Home repair: excavating garage	5
									11500	Occupation: operating heavy duty equipment, automated, not driving	2.5
		041112	Major home improvements and repairs			4	yes	no	11120	Occupation: construction, outside, remodeling, new structures (e.g. roof repair, miscellaneous)	4
									11475	Occupation: manual or unskilled labor, general, light effort	2.8
									11476	Occupation: manual or unskilled labor, general, moderate effort	4.5
									11477	Occupation: manual or unskilled labor, general, vigorous effort	6.5
									06072	Home repair: carpentry, home remodeling tasks, moderate effort	4
									06074	Home repair: carpentry, home remodeling tasks, light effort	2.3
									06126	Home repair: home repair, general, light effort	2.5
									06127	Home repair: home repair, general, moderate effort	4.5
									06128	Home repair: home repair, general, vigorous effort	6
		041113	Building and repair of animal and poultry sheds/shelter, business place, field walls/fences, storage facilities for farm produce, irrigation			4.3	yes	no	11120	Occupation: construction, outside, remodeling, new structures (e.g. roof repair, miscellaneous)	4
									11475	Occupation: manual or unskilled labor, general, light effort	2.8
									11476	Occupation: manual or unskilled labor, general, moderate effort	4.5
									11477	Occupation: manual or unskilled labor, general, vigorous effort	6.5
									11480	Occupation: masonry, concrete, moderate effort	4.3
									11482	Occupation: masonry, concrete, light effort	2.5
									11038	Occupation: carpentry, general, light effort	2.5
									11040	Occupation: carpentry, general, moderate effort	4.3
									11042	Occupation: carpentry, general, heavy or vigorous effort	7
									06130	Home repair: laying or removing carpet	4.5
									06150	Home repair: painting, outside home (Taylor Code 650)	5
									06160	Home repair: painting inside home, wallpapering, scraping paint	3.3
									06180	Home repair: roofing	6
									11500	Occupation: operating heavy duty equipment, automated, not driving	2.5
		041119	Other specified activities related to construction and repair for own capital formation			4.3	yes	no
		04111x	Construction and repair for own capital formation n.f.d.			4.3	yes	no
	04112	041120	Construction and repair of buildings, roads, dams and other structures			4.5	yes	no	11120	Occupation: construction, outside, remodeling, new structures (e.g. roof repair, miscellaneous)	4
									11030	Occupation: building road, driving heavy machinery	6
									11035	Occupation: building road, directing traffic, standing	2
									11135	Occupation: engineer (e.g., mechanical or electrical)	1.8
									11500	Occupation: operating heavy duty equipment, automated, not driving	2.5
									11450	Occupation: machine tooling, operating punch press, moderate effort	5
									11780	Occupation: using heavy power tools such as pneumatic tools (e.g. jackhammers, drills)	6.3
									11790	Occupation: using heavy tools (not power) such as shovel, pick, tunnel bar, spade	8
									11050	Occupation: carrying heavy loads (e.g. bricks, tools)	8
									11475	Occupation: manual or unskilled labor, general, light effort	2.8
									11476	Occupation: manual or unskilled labor, general, moderate effort	4.5
									11477	Occupation: manual or unskilled labor, general, vigorous effort	6.5
									11480	Occupation: masonry, concrete, moderate effort	4.3
	04113	041130	Community-organized construction and major repairs of roads, buildings, bridges, dams etc.			4.5	yes	no	11120	Occupation: construction, outside, remodeling, new structures (e.g. roof repair, miscellaneous)	4
									11030	Occupation: building road, driving heavy machinery	6
									11035	Occupation: building road, directing traffic, standing	2
									11135	Occupation: engineer (e.g., mechanical or electrical)	1.8
									11500	Occupation: operating heavy duty equipment, automated, not driving	2.5
									11450	Occupation: machine tooling, operating punch press, moderate effort	5
									11780	Occupation: using heavy power tools such as pneumatic tools (e.g. jackhammers, drills)	6.3
									11790	Occupation: using heavy tools (not power) such as shovel, pick, tunnel bar, spade	8
									11050	Occupation: carrying heavy loads (e.g. bricks, tools)	8
									11475	Occupation: manual or unskilled labor, general, light effort	2.8
									11476	Occupation: manual or unskilled labor, general, moderate effort	4.5
									11477	Occupation: manual or unskilled labor, general, vigorous effort	6.5
									11480	Occupation: masonry, concrete, moderate effort	4.3
	04114	041140	Training and studies in relation to work in construction activities in household enterprise			3.25	yes	no	09065	Miscellaneous: sitting, in class, general, including note-taking or class discussion	1.8
									21020	Volunteer activities: standing, light/moderate work (e.g. pack boxes, assemble/repair, set up chairs/furniture)	3
									21025	Volunteer activities: standing, moderate (lifting 50 lbs, assembling at fast rate)	3.5
									21030	Volunteer activities: standing, moderate/heavy work	4.5
	0411x		Working time in construction activities n.f.d.			4.4	yes	no
0412			Acquiring inputs/supplies for construction activities for household production			1.8	yes	yes
	04120	041200	Purchasing/acquiring inputs/supplies for construction activities for household production			1.8	yes	yes	05065	Home activities: non-food shopping with or without a grocery cart, standing or walking	2.3
									09050	Miscellaneous: standing, talking in person, on the phone, computer, or text messaging, light effort	1.8
									09055	Miscellaneous: sitting, talking in person, on the phone, computer, or text messaging, light effort	1.5
0420			Looking for work/setting up business in construction activities in household enterprise			1.575	yes	yes
	04201	042010	Looking for work in construction activities in household enterprise			1.5	yes	yes	09030	Miscellaneous: sitting, reading, book, newspaper, etc.	1.3
									09050	Miscellaneous: standing, talking in person, on the phone, computer, or text messaging, light effort	1.8
									09055	Miscellaneous: sitting, talking in person, on the phone, computer, or text messaging, light effort	1.5
	04202	042020	Looking for/setting up business in construction activities as household enterprise			1.65	yes	yes	09040	Miscellaneous: sitting, writing, desk work, typing	1.3
									09050	Miscellaneous: standing, talking in person, on the phone, computer, or text messaging, light effort	1.8
									09055	Miscellaneous: sitting, talking in person, on the phone, computer, or text messaging, light effort	1.5
									17161	Walking: walking from house to car or bus, from car or bus to go places, from car or bus to and from the worksite	2.5
0430			Travel related to construction activities of households			n/a	yes	n/a
	04300	043000	Travel related to construction activities of households			n/a	yes	n/a
0490			Work for household in construction activities n.e.c.			3.775	yes	no
	04900	049000	Work for household in construction activities n.e.c.			3.775	yes	no
n.f.d. : Not Further Defined
n.e.c : Not Elsewhere Classified

## Sheet: 05 household service
ICATUS 2005				ICATUS 2016		Summary METs	Wakefulness (Yes/No)	Sitting/reclining/lying (Yes/No)	Compendium
Code			Description	Code	Description				Code	Major heading: specific activities	METs
0511			Food vending and trading			2.5	yes	no
	05111		Preparing and selling food and beverage			3	yes	no
		051111	Preparing/packing food and beverage preparations			3	yes	no	05049	Home activities: cooking or food preparation, moderate effort	3.5
									05050	Home activities: cooking or food preparation - standing or sitting or in general (not broken into stand/walk components), manual appliances, light effort	2
									05052	Home activities: cooking or food preparation, walking	2.5
									05146	Home activities: standing, packing/unpacking boxes, occasional lifting of lightweight household items, loading or unloading items in car, moderate effort	3.5
		051112	Selling/delivering food and beverage preparations			3	yes	no	05050	Home activities: cooking or food preparation - standing or sitting or in general (not broken into stand/walk components), manual appliances, light effort	2
									05051	Home activities: serving food, setting table, implied walking or standing	2.5
									05146	Home activities: standing, packing/unpacking boxes, occasional lifting of lightweight household items, loading or unloading items in car, moderate effort	3.5
									11795	Occupation: walking on job, 2.5 mph, slow speed and carrying light objects less than 25 lbs	3.5
									11767	Occupation: Truch, driving delivery truck, taxi, shuttlebus, school bus	2
									16030	Transportation: motor scooter, motorcycle	3.5
		051113	Putting up food stalls; cleaning and maintenance			2.5	yes	no	05035	Home activities: kitchen activity, general (e.g. cooking, washing dishes, cleaning up), moderate effort	3.3
									05041	Home activities: wash dishes, standing or in general (not broken into stand/walk components)	1.8
									05042	Home activities: wash dishes, clearing dishes from table, walking, light effort	2.5
									05051	Home activities: serving food, setting table, implied walking or standing	2.5
									05146	Home activities: standing, packing/unpacking boxes, occasional lifting of lightweight household items, loading or unloading items in car, moderate effort	3.5
									05023	Home activities: mopping, standing, light effort	2.5
									05040	Home activities: cleaning, general (straightening up, changing linen, carrying out trash), light effort	2.5
									05043	Home activities: vacuuming, general, moderate effort	3.3
									05010	Home activities: cleaning, sweeping carpet or floors, general	3.3
		051119	Other specified activities related to preparing and selling food and beverage			3	yes	no
		05111x	Preparing and selling food and beverage n.f.d.			3	yes	no
	05112		Petty trading, door-to-door vending, street vending, hawking			2	yes	no
		051121	Petty trading			2	yes	no	11610	Occupation: standing, light/moderate effort (e.g. assemble/repair heavy parts, welding, stocking parts, auto repair, standing, packing boxes, nursing patient care)	3
									11791	Occupation: walking on job, less than 2 mph, very slow speed, in office or lab area	2
									05065	Home activities: non-food shopping with or without a grocery cart, standing or walking	2.3
									09050	Miscellaneous: standing, talking in person, on the phone, computer, or text messaging, light effort	1.8
									09055	Miscellaneous: sitting, talking in person, on the phone, computer, or text messaging, light effort	1.5
		051122	Door-to-door vending			3.5	yes	no	11795	Occupation: walking on job, 2.5 mph, slow speed and carrying light objects less than 25 lbs	3.5
									11797	Occupation: walking, 2.5 mph, slow speed, carrying heavy objects more than 25 lbs	3.8
									09050	Miscellaneous: standing, talking in person, on the phone, computer, or text messaging, light effort	1.8
		051123	Street vending, hawking and other itinerant trading			1.9	yes	no	09055	Miscellaneous: sitting, talking in person, on the phone, computer, or text messaging, light effort	1.5
									09050	Miscellaneous: standing, talking in person, on the phone, computer, or text messaging, light effort	1.8
									11610	Occupation: standing, light/moderate effort (e.g. assemble/repair heavy parts, welding, stocking parts, auto repair, standing, packing boxes, nursing patient care)	3
									11791	Occupation: walking on job, less than 2 mph, very slow speed, in office or lab area	2
		051129	Other specified activities related to petty trading and vending activities			2	yes	no
		05112x	Trading n.f.d.			2	yes	no
0512			Providing repair, installation and maintenance services	132	Providing paid repair, installation, maintenance and disposal in households and household enterprises	3	yes	no
	05121	051210	Fitting, installing, tool setting, maintaining and repairing tools and machinery			3	yes	no	11430	Occupation: machine tooling (e.g. maching, working sheet metal, machine fitter, operating lathe, welding) light-to-moderate effort	3
									11450	Occupation: machine tooling, operating punch press, moderate effort	5
									06205	Home repair: sharpening tools	2
									08251	Lawn and garden: walking, gathering gardening tools	3
									11600	Occupation: standing tasks, light effort (e.g. bartending, store clerk, assembling, filing, duplicating, librarian, putting up a Christmas tree, standing and talking at work, changing clothes when teaching physical education, standing)	3
	05122	051220	Repair of vehicles			3.65	yes	no	06020	Home repair: automobile body work	4
									06030	Home repair: automobile repair, light or moderate effort	3.3
	05123	051230	Repair of personal goods			2.3	yes	no	11720	Occupation: tailoring, cutting fabric	2.3
									11730	Occupation: tailoring, general	2.5
									11740	Occupation: tailoring, hand sewing	1.8
									11750	Occupation: tailoring, machine sewing	2.5
									11760	Occupation: tailoring, pressing	3.5
									11763	Occupation: tailoring, weaving, light effort (e.g. finishing operations, washing, dyeing, inspecting cloth, counting yards, paperwork)	2
									11765	Occupation: tailoring, weaving, moderate effort (e.g. spinning and weaving operations, delivering boxes of yam to spinners, loading of warp bean, pinwinding, conewinding, warping, cloth cutting)	4
									11530	Occupation: shoe repair, general	2
									11580	Occupation: sitting tasks, light effort (e.g. office work, chemistry lab work, computer work, light assembly repair, watch repair, reading, desk work)	1.5
	05124	051240	Repair of household goods			3	yes	no	06144	Home repair: repairing appliances	3
									06060	Home repair: carpentry, finishing or refinishing cabinets or furniture	3.3
									21020	Volunteer activities: standing, light/moderate work (e.g. pack boxes, assemble/repair, set up chairs/furniture)	3
0513			Providing business and professional services			1.65	yes	yes
	05131	051310	Renting out rooms, sleeping space and associated work			1.65	yes	yes	09055	Miscellaneous: sitting, talking in person, on the phone, computer, or text messaging, light effort	1.5
									09050	Miscellaneous: standing, talking in person, on the phone, computer, or text messaging, light effort	1.8
	05132	051320	Lending and collecting money; foreign exchange			1.5	yes	yes	09055	Miscellaneous: sitting, talking in person, on the phone, computer, or text messaging, light effort	1.5
	05133	051330	Typing, word-processing, programming, encoding			1.3	yes	yes	11770	Occupation: typing, electric, manual or computer	1.3
	05134	051340	Accounting, bookkeeping, legal and related services			1.3	yes	yes	09040	Miscellaneous: sitting, writing, desk work, typing	1.3
	05135	051350	Tutoring			1.65	yes	yes	09055	Miscellaneous: sitting, talking in person, on the phone, computer, or text messaging, light effort	1.5
									09050	Miscellaneous: standing, talking in person, on the phone, computer, or text messaging, light effort	1.8
	05136	051360	Provision of medical and dental services			2	yes	no	11580	Occupation: sitting tasks, light effort (e.g. office work, chemistry lab work, computer work, light assembly repair, watch repair, reading, desk work)	1.5
									11610	Occupation: standing, light/moderate effort (e.g. assemble/repair heavy parts, welding, stocking parts, auto repair, standing, packing boxes, nursing patient care)	3
									11791	Occupation: walking on job, less than 2 mph, very slow speed, in office or lab area	2
	05137	051370	Provision of nursing/therapy services			2	yes	no	11610	Occupation: standing, light/moderate effort (e.g. assemble/repair heavy parts, welding, stocking parts, auto repair, standing, packing boxes, nursing patient care)	3
									11580	Occupation: sitting tasks, light effort (e.g. office work, chemistry lab work, computer work, light assembly repair, watch repair, reading, desk work)	1.5
									11791	Occupation: walking on job, less than 2 mph, very slow speed, in office or lab area	2
0514			Providing personal care services			1.9	yes	no
	05141	051410	Provision of personal care services			1.8	yes	no	11378	Occupation: hairstylist (e.g. plaiting hair, manicure, make-up artist)	1.8
									14020	Sexual activity: general, moderate effort	1.8
									11485	Occupation: massage therapist, standing	4
	05142	051420	Provision of non-professional health-care			2	yes	no	11610	Occupation: standing, light/moderate effort (e.g. assemble/repair heavy parts, welding, stocking parts, auto repair, standing, packing boxes, nursing patient care)	3
									11580	Occupation: sitting tasks, light effort (e.g. office work, chemistry lab work, computer work, light assembly repair, watch repair, reading, desk work)	1.5
									11791	Occupation: walking on job, less than 2 mph, very slow speed, in office or lab area	2
0515			Transporting goods and passengers	134	Transporting goods and passengers for pay or profit in households and household enterprises	2.5	yes	yes
	05151	051510	Transporting goods			2.5	yes	yes	16010	Transportation: automobile or light truck (not a semi) driving	2.5
									16015	Transportation: riding in a car or truck	1.3
									16020	Transportation: flying airplane or helicopter	1.8
									16035	Transportation: pulling rickshaw	6.3
									16040	Transportation: pushing plane in and out of hangar	6
									16050	Transportation: truck, semi, tractor, >1 ton, or bus, driving	2.5
									11500	Occupation: operating heavy duty equipment, automated, not driving	2.5
									11766	Occupation: truck driving, loading and unloading truck, tying down load, standing, walking and carrying heavy loads	6.5
									11767	Occupation: Truch, driving delivery truck, taxi, shuttlebus, school bus	2
									18010	Water activities: boating, power, driving	2.5
									18120	Water activities: sailing, boat and board sailing, windsurfing, ice sailing, general (Taylor Code 235)	3
									06220	Home repair: washing and waxing hull of sailboat or airplane	4.5
									05020	Home activities: cleaning, heavy or major (e.g. wash car, wash windows, clean garage), moderate effort	3.5
									11590	Occupation: sitting tasks, moderate effort (e.g. pushing heavy levers, riding mower/forlift, crane operation)	2.5
									11610	Occupation: standing, light/moderate effort (e.g. assemble/repair heavy parts, welding, stocking parts, auto repair, standing, packing boxes, nursing patient care)	3
									09071	Miscellaneous: standing, miscellaneous	2.5
	05152	051520	Transporting passengers			2.5	yes	yes	16010	Transportation: automobile or light truck (not a semi) driving	2.5
									16015	Transportation: riding in a car or truck	1.3
									16020	Transportation: flying airplane or helicopter	1.8
									16040	Transportation: pushing plane in and out of hangar	6
									16050	Transportation: truck, semi, tractor, >1 ton, or bus, driving	2.5
									11500	Occupation: operating heavy duty equipment, automated, not driving	2.5
									11767	Occupation: Truch, driving delivery truck, taxi, shuttlebus, school bus	2
									18010	Water activities: boating, power, driving	2.5
									18120	Water activities: sailing, boat and board sailing, windsurfing, ice sailing, general (Taylor Code 235)	3
									06220	Home repair: washing and waxing hull of sailboat or airplane	4.5
									05020	Home activities: cleaning, heavy or major (e.g. wash car, wash windows, clean garage), moderate effort	3.5
									11590	Occupation: sitting tasks, moderate effort (e.g. pushing heavy levers, riding mower/forlift, crane operation)	2.5
									11610	Occupation: standing, light/moderate effort (e.g. assemble/repair heavy parts, welding, stocking parts, auto repair, standing, packing boxes, nursing patient care)	3
									09071	Miscellaneous: standing, miscellaneous	2.5
0516			Paid domestic services			2.225	yes	no
	05160	051600	Providing paid domestic services	136	Providing paid domestic services	2.225	yes	no		All types of activities defined in Major Divisions 05 and 06
0517			Meetings/training and studies			1.65	yes	yes
	05170	051700	Training and studies related to work in service activities			1.65	yes	yes	09060	Miscellaneous: sitting, studying, general, including reading and/or writing, light effort	1.3
									09065	Miscellaneous: sitting, in class, general, including note-taking or class discussion	1.8
									09050	Miscellaneous: standing, talking in person, on the phone, computer, or text messaging, light effort	1.8
									09055	Miscellaneous: sitting, talking in person, on the phone, computer, or text messaging, light effort	1.5
051x			Working time in providing services for income n.f.d.			2	yes	no
0520			Looking for work/setting up business in service activities in household enterprise			1.5	yes	yes
	05200	052000	Looking for work in service activities in household enterprise			1.5	yes	yes	09055	Miscellaneous: sitting, talking in person, on the phone, computer, or text messaging, light effort	1.5
									09030	Miscellaneous: sitting, reading, book, newspaper, etc.	1.3
									09050	Miscellaneous: standing, talking in person, on the phone, computer, or text messaging, light effort	1.8
0530			Travel related to providing services for income			n/a	yes	n/a
	05300	053000	Travel related to providing services for income			n/a	yes	n/a
0590			Work for household providing services for income n.e.c.			2	yes	no
	05900	059000	Work for household providing services for income n.e.c.			2	yes	no
n.f.d. : Not Further Defined
n.e.c : Not Elsewhere Classified

## Sheet: 06 unpaid domestic service
ICATUS 2005				ICATUS 2016		Summary METs	Wakefulness (Yes/No)	Sitting/reclining/lying (Yes/No)	Compendium
Code			Description	Code	Description				Code	Major heading: specific activities	METs
0611			Unpaid domestic services			2.5125	yes	no
	06111		Food management			2.5	yes	no
		061111	Preparing meals/snacks	311	Preparing meals/snacks	2.5	yes	no	05049	Home activities: cooking or food preparation, moderate effort	3.5
									05050	Home activities: cooking or food preparation - standing or sitting or in general (not broken into stand/walk components), manual appliances, light effort	2
									05052	Home activities: cooking or food preparation, walking	2.5
		061112	Serving meals/snacks	312	Serving meals/snacks	2.5	yes	no	05051	Home activities: serving food, setting table, implied walking or standing	2.5
		061113	Cleaning up after food preparation/meals/snacks	313	Cleaning up after food preparation/meals/snacks	2.5	yes	no	05035	Home activities: kitchen activity, general (e.g. cooking, washing dishes, cleaning up), moderate effort	3.3
									05041	Home activities: wash dishes, standing or in general (not broken into stand/walk components)	1.8
									05042	Home activities: wash dishes, clearing dishes from table, walking, light effort	2.5
		061119	Other specified activities related to food management	319	Other activities related to food and meals management and preparation	2.5	yes	no
		06111x	Food management n.f.d.			2.5	yes	no
	06112		Cleaning and upkeep of dwelling and surroundings			3.35	yes	no
		061121	Indoor cleaning	321	Indoor cleaning	3.3	yes	no	05010	Home activities: cleaning, sweeping carpet or floors, general	3.3
									05021	Home activities: cleaning, mopping, standing, moderate effort	3.5
									05022	Home activities: cleaning windows, washing windows, general	3.2
									05023	Home activities: mopping, standing, light effort	2.5
									05024	Home activities: polishing floors, standing, walking slowly, using electric polishing machine	4.5
									05025	Home activities: multiple household tasks all at once, light effort	2.8
									05026	Home activities: multiple household tasks all at once, moderate effort	3.5
									05027	Home activities: multiple household tasks all at once, vigorous effort	4.3
									05030	Home activities: cleaning, house or cabin, general, moderate effort	3.3
									05032	Home activities: dusting or polishing furniture, general	2.3
									05040	Home activities: cleaning, general (straightening up, changing linen, carrying out trash), light effort	2.5
									05043	Home activities: vacuuming, general, moderate effort	3.3
									05100	Home activities: making bed, changing linens	3.3
									05120	Home activities: moving furniture, household items, carrying boxes	5.8
									05121	Home activities: moving, lifting light loads	5
									05125	Home activities: organizing room	4.8
									05130	Home activities: scrubbing floors, on hands and knees, srubbing bathroom, bathtub, moderate effort	3.5
									05131	Home activities: scrubbing floors, on hands and knees, srubbing bathroom, bathtub, light effort	2
									05132	Home activities: scrubbing floors, on hands and knees, srubbing bathroom, bathtub, vigorous effort	6.5
									05147	Home activities: implied walking, putting away household items, moderate effort	3
		061122	Outdoor cleaning	322	Outdoor cleaning	4	yes	no	05020	Home activities: cleaning, heavy or major (e.g. wash car, wash windows, clean garage), moderate effort	3.5
									05030	Home activities: cleaning, house or cabin, general, moderate effort	3.3
									05140	Home activities: sweeping garage, sidewalk or outside of house	4
									05147	Home activities: implied walking, putting away household items, moderate effort	3
									06120	Home repair: hanging storm windows	5
									06230	Home repair: washing fence, paiting fence, moderate effort	4.5
									08130	Lawn and garden: operating snow blower, walking	2.5
									08160	Lawn and garden: raking lawn or leaves, moderate effort	3.8
									08165	Lawn and garden: raking lawn (Taylor Code 600)	4
									08170	Lawn and garden: raking roof with snow rake	4
									08180	Lawn and garden: riding snow blower	3
									08190	Lawn and garden: sacking grass, leaves	4
									08192	Lawn and garden: shoveling dirt or mud	5.5
									08200	Lawn and garden: shoveling snow, by hand (Taylor Code 610)	6
		061123	Recycling; disposal of garbage	323	Recycling and disposal of garbage	2.5	yes	no	05040	Home activities: cleaning, general (straightening up, changing linen, carrying out trash), light effort	2.5
		061124	Care of outdoor garden, landscaping, trimming, grounds/yard/lawn maintenance	324	Upkeep of in/outdoor plants, hedges, garden, grounds, landscape, etc.	4.15	yes	no	08025	Lawn and garden: clearing light brush, thining garden, moderate effort	3.5
									08030	Lawn and garden: clearing brush/land, undergrowth, or ground, hauling branches, wheelbarrow chores, vigorous effort	6.3
									08040	Lawn and garden: digging sandbox, shoveling sand	5
									08050	Lawn and garden: digging, spading, filling garden, composting, (Taylor Code 590)	5
									08060	Lawn and garden: gardening with heavy power tools, tilling a garden, chain saw	5.8
									08065	Lawn and garden: gardening, using containers, older adults > 60 years	2.3
									08090	Lawn and garden: laying sod	5
									08095	Lawn and garden: mowing lawn, general	5.5
									08135	Lawn and garden: planting, potting, transplanting seedlings or plants, light effort	2
									08140	Lawn and garden: planting seedlings, shrub, stooping, moderate effort	4.3
									08145	Lawn and garden: planting crops or garden, stooping, moderate effort	4.3
									08150	Lawn and garden: planting trees	4.5
									08210	Lawn and garden: trimming shrubs or trees, manual cutter	4
									08215	Lawn and garden: trimming shrubs or trees, power cutter, using leaf blower, edge, moderate effort	3.5
									08220	Lawn and garden: walking, applying fertilizer or seeding a lawn, push applicator	3
									08230	Lawn and garden: watering lawn or garden, standing or walking	1.5
									08240	Lawn and garden: weeding, cultivating garden (Taylor Code 580)	4.5
									08245	Lawn and garden: gardening, general, moderate effort	3.8
									08246	Lawn and garden: picking fruit off trees, picking fruits/vegetables, moderate effort	3.5
									08248	Lawn and garden: picking fruit off trees, gleaning fruits, picking fruits/vegetables, climbing ladder to pick fruit, vigorous effort	4.5
									08250	Lawn and garden: implied walking/standing - picking up yard, light, picking flowers or vegetables	3.3
									08251	Lawn and garden: walking, gathering gardening tools	3
									08255	Lawn and garden: wheelbarrow, pushing garden cart or wheelbarrow	5.5
									08260	Lawn and garden: yard work, general, light effort	3
									08261	Lawn and garden: yard work, general, moderate effort	4
									08262	Lawn and garden: yard work, general, vigorous effort	6
		061125	Heating and water supply (including tending furnaces, boilers and fire places)	325	Tending furnace, boiler, fireplace for heating and water supply	3.4	yes	no	11125	Occupation: custodial work, light effort (e.g. cleaning sink and toilet, dusting, vacuuming, light cleaning)	2.3
									11126	Occupation: custodial work, moderate effort (e.g. electric buffer, feathering arena floors, mopping, taking out trash, vacuuming)	3.8
									06100	Home repair: cleaning gutters	5
									06167	Home repair: plumbing, general	3
									05149	Home activities: building a fire inside	2.5
									05160	Home activities: standing, light effort tasks (pump gas, change light bulb, etc.)	2
									11708	Occupation: steel mill, moderate effort (e.g. fetting, forging, tipping molds)	5.3
									11710	Occupation: steel mill, vigorous effort (e.g. hand rolling, merchant mill rolling, removing slag, tending furnace)	8.3
		061126	Making various household arrangements	329	Other activities related to cleaning and upkeep of dwelling and surroundings	2.5	yes	no	05055	Home activities: putting away groceries (e.g. carrying groceries, shopping without a grocery cart), carrying packages	2.5
									05095	Home activities: laundry, putting away clothes, gathering clothes to pack, putting away laundry, implied walking	2.3
									05147	Home activities: implied walking, putting away household items, moderate effort	3
									05160	Home activities: standing, light effort tasks (pump gas, change light bulb, etc.)	2
									05165	Home activities: walking, moderate effort tasks, non-cleaning (readying to leave, shut/lock doors, close windows, etc.)	3.5
									05040	Home activities: cleaning, general (straightening up, changing linen, carrying out trash), light effort	2.5
		061129	Other specified activities related to cleaning and upkeep of dwelling and surroundings			3.35	yes	no
		06112x	Cleaning and upkeep of dwelling and surroundings n.f.d.			3.35	yes	no
	06113		Do-it-yourself decoration, maintenance and small repairs			3	yes	no
		061131	Do-it-yourself improvement, maintenance and repair of dwellings	331	Do-it-yourself improvement, maintenance and repair of own dwelling	3.3	yes	no	06040	Home repair: carpentry, general, workshop (Taylor Code 620)	3
									06160	Home repair: painting inside house, wallpapering, scraping paint	3.3
									06165	Home repair: painting, (Taylor Code 630)	4.5
									06122	Home repair: hanging sheet rock inside house	5
									06150	Home repair: painting, outside home (Taylor Code 650)	5
									06160	Home repair: painting inside house, wallpapering, scraping paint	3.3
									06167	Home repair: plumbing, general	3
									06180	Home repair: roofing	6
									06240	Home repair: wiring, tapping - splicing	3.3
		061132	Installation, servicing and repair of personal and household goods	332	Installation, servicing and repair of personal and household goods including ICT equipment	3	yes	no	06144	Home repair: repairing appliances	3
									21020	Volunteer activities: standing, light/moderate work (e.g. pack boxes, assemble/repair, set up chairs/furniture)	3
									21025	Volunteer activities: standing, moderate (lifting 50 lbs, assembling at fast rate)	3.5
		061133	Vehicle maintenance and minor repairs	333	Vehicle maintenance and repairs	2.65	yes	no	06225	Home repair: washing and waxing car	2
									06030	Home repair: automobile repair, light or moderate effort	3.3
		061139	Other specified activities related to do-it-yourself decoration, maintenance and small repairs	339	Other activities related to do-it-yourself decoration, maintenance and repair	3	yes	no
		06113x	Do-it-yourself decoration, maintenance and small repairs n.f.d.			3	yes	no
	06114		Care of textiles and footwear			2.4	yes	no
		061141	Hand-washing; loading/unloading washing machine	341	Hand/machine-washing	3	yes	no	05090	Home activities: laundry, fold or hang clothes, put clothes in washer or dryer, packing suitcase, washing clothes by hand, implied standing, light effort	2
									05092	Home activities: laundry, hanging wash, washing clothes by hand, moderate effort	4
		061142	Drying; hanging out, bringing in wash	342	Drying; hanging out, bringing in wash	3	yes	no	05090	Home activities: laundry, fold or hang clothes, put clothes in washer or dryer, packing suitcase, washing clothes by hand, implied standing, light effort	2
									05092	Home activities: laundry, hanging wash, washing clothes by hand, moderate effort	4
		061143	Ironing/pressing			1.8	yes	yes	05070	Home activities: ironing	1.8
		061144	Sorting, folding, storing			2.15	yes	no	05090	Home activities: laundry, fold or hang clothes, put clothes in washer or dryer, packing suitcase, washing clothes by hand, implied standing, light effort	2
									05095	Home activities: laundry, putting away clothes, gathering clothes to pack, putting away laundry, implied walking	2.3
		061145	Mending/repairing and care of clothes; cleaning and polishing shoes	344	Mending/repairing and care of clothes and shoes; cleaning and polishing shoes	2.4	yes	yes	11720	Occupation: tailoring, cutting fabric	2.3
									11730	Occupation: tailoring, general	2.5
									11740	Occupation: tailoring, hand sewing	1.8
									11750	Occupation: tailoring, machine sewing	2.5
									11760	Occupation: tailoring, pressing	3.5
									11763	Occupation: tailoring, weaving, light effort (e.g. finishing operations, washing, dyeing, inspecting cloth, counting yards, paperwork)	2
									11765	Occupation: tailoring, weaving, moderate effort (e.g. spinning and weaving operations, delivering boxes of yam to spinners, loading of warp bean, pinwinding, conewinding, warping, cloth cutting)	4
									11530	Occupation: shoe repair, general	2
		061149	Other specified care of textiles and footwear	349	Other activities related to care of textiles and footwear	2.4	yes	no
		06114x	Care of textiles and footwear n.f.d.			2.4	yes	no
	06115		Household management			2.3	yes	yes
		061151	Paying household bills (utilities, cable television etc.)	351	Paying household bills	2.3	yes	yes	21005	Volunteer activities: sitting, light office work, in general	1.5
									21015	Volunteer activities: standing, light work (filing, talking, assembling)	2.3
									21070	Volunteer activities: walk/stand combination, for volunteer purposes	3
		061152	Budgeting, organizing, planning	352	Budgeting, planning, organizing duties and activities in the household	1.5	yes	yes	21005	Volunteer activities: sitting, light office work, in general	1.5
		061153	Selling, disposing of household assets			2.3	yes	yes	21005	Volunteer activities: sitting, light office work, in general	1.5
									21015	Volunteer activities: standing, light work (filing, talking, assembling)	2.3
									21070	Volunteer activities: walk/stand combination, for volunteer purposes	3
		061159	Other specified household management	359	Other activities related to household management	2.3	yes	yes
		06115x	Household management n.f.d.			2.3	yes	yes
	06116		Pet care			2.525	yes	no
		061161	Daily care including feeding, cleaning, grooming, walking	361	Daily pet care	2.75	yes	no	05053	Home activities: feeding household animals	2.5
									05197	Home activities: animal care, household animals, general	2.3
									05195	Home activities: standing, bathing dog	3.5
									17165	Walking: walking the dog	3
		061162	Taking pets for veterinary care	362	Using veterinary care or other pet care services (grooming, stabling, holiday or day care)	2.3	yes	no	07021	Inactivity quiet/light: sitting quietly, general	1.3
									05182	Home activities: walking and carrying small child, child weighing less than 15 lbs	2.3
									05181	Home activities: walking and carrying small child, child weighing 15 lbs or more	3
									05183	Home activities: standing, holding child	2
									17165	Walking: walking the dog	3
		061169	Other specified pet care	369	Other activities related to pet care	2.53	yes	no
		06116x	Pet care n.f.d.			2.53	yes	no
0612			Shopping			1.825	yes	no
	06121		Shopping for/purchasing of goods and related activities	371	Shopping for/purchasing of goods and related activities	2	yes	no
		061211	Shopping for/purchasing of consumer goods			2.3	yes	no	05060	Home activities: food shopping with or without a grocery cart, standing or walking	2.3
									05065	Home activities: non-food shopping with or without a grocery cart, standing or walking	2.3
		061212	Shopping for/purchasing of durable/capital goods			1.8	yes	no	05065	Home activities: non-food shopping with or without a grocery cart, standing or walking	2.3
									09050	Miscellaneous: standing, talking in person, on the phone, computer, or text messaging, light effort	1.8
									09055	Miscellaneous: sitting, talking in person, on the phone, computer, or text messaging, light effort	1.5
		061213	Window shopping			2	yes	no	17151	Walking: walking, less than 2.0 mph, level, strolling, very slow	2
		061219	Other specified shopping for/purchasing of goods and related activities			2	yes	no
		06121x	Shopping for/purchasing of goods and related activities n.f.d.			2	yes	no
	06122		Shopping for/availing of services and related activities	372	Shopping for/availing of services and related activity	1.65	yes	yes
		061221	Shopping for/availing of repair and maintenance services			1.8	yes	yes	17152	Walking: walking, household	2
									09050	Miscellaneous: standing, talking in person, on the phone, computer, or text messaging, light effort	1.8
									09055	Miscellaneous: sitting, talking in person, on the phone, computer, or text messaging, light effort	1.5
		061222	Shopping for/availing of administrative services			1.65	yes	yes	09050	Miscellaneous: standing, talking in person, on the phone, computer, or text messaging, light effort	1.8
									09055	Miscellaneous: sitting, talking in person, on the phone, computer, or text messaging, light effort	1.5
		061223	Shopping for personal care services (not for oneself)			1.65	yes	yes	09050	Miscellaneous: standing, talking in person, on the phone, computer, or text messaging, light effort	1.8
									09055	Miscellaneous: sitting, talking in person, on the phone, computer, or text messaging, light effort	1.5
		061224	Shopping for medical and health-care services (not for oneself)			1.65	yes	yes	09050	Miscellaneous: standing, talking in person, on the phone, computer, or text messaging, light effort	1.8
									09055	Miscellaneous: sitting, talking in person, on the phone, computer, or text messaging, light effort	1.5
		061225	Shopping for/availing of childcare services			1.65	yes	yes	09050	Miscellaneous: standing, talking in person, on the phone, computer, or text messaging, light effort	1.8
									09055	Miscellaneous: sitting, talking in person, on the phone, computer, or text messaging, light effort	1.5
		061226	Shopping for educational services			1.65	yes	yes	09060	Miscellaneous: sitting, studying, general, including reading and/or writing, light effort	1.3
									09065	Miscellaneous: sitting, in class, general, including note-taking or class discussion	1.8
									09050	Miscellaneous: standing, talking in person, on the phone, computer, or text messaging, light effort	1.8
									09055	Miscellaneous: sitting, talking in person, on the phone, computer, or text messaging, light effort	1.5
		061227	Availing of government/public services			1.5	yes	yes	07021	Inactivity quiet/light: sitting quietly, general	1.3
									09050	Miscellaneous: standing, talking in person, on the phone, computer, or text messaging, light effort	1.8
									09055	Miscellaneous: sitting, talking in person, on the phone, computer, or text messaging, light effort	1.5
		061229	Other specified shopping/availing of services			1.65	yes	yes
		06122x	Shopping for/availing of services and related activities n.f.d			1.65	yes	yes
061x			Working time in providing unpaid domestic services for own final use n.f.d.			2.45	yes	no
0620			Travel related to provision of unpaid domestic services			n/a	yes	n/a
	06200	062000	Travel related to provision of unpaid domestic services			n/a	yes	n/a
0690			Unpaid domestic services n.e.c.			2.45	yes	no
	06900	069000	Unpaid domestic services n.e.c.			2.45	yes	no
n.f.d. : Not Further Defined
n.e.c : Not Elsewhere Classified

## Sheet: 07 unpaid caregiving
ICATUS 2005				ICATUS 2016		Summary METs	Wakefulness (Yes/No)	Sitting/reclining/lying (Yes/No)	Compendium
Code			Description	Code	Description				Code	Major heading: specific activities	METs
0711			childcare			1.9	yes	no
	07111		Caring for children/physical care			2	yes	no
		071111	General childcare			2.15	yes	no	05184	Home activities: child care, infant, general	2.5
									05185	Home activities: child care, sitting/kneeling (e.g. dressing, bathing, grooming, feeding, occasional lifting of child), light effort, general	2
									05186	Home activities: child care, standing (e.g. dressing, bathing, grooming, feeding, occasional lifting of child), moderate effort	3
									17021	Walking: carrying 15 lb child, slow walking	2.3
									05181	Home activities: walking and carrying small child, child weighing 15 lbs or more	3
									05183	Home activities: standing, holding child	2
									05188	Home activities: reclining with baby	1.5
									05189	Home activities: breastfeeding, sitting or reclining	2
		071112	Putting children to bed			1.4	yes	yes	07070	Inactivity quiet/light: reclining, reading	1.3
									09055	Miscellaneous: sitting, talking in person, on the phone, computer, or text messaging, light effort	1.5
		071113	Getting children ready for school			2.5	yes	no	05185	Home activities: child care, sitting/kneeling (e.g. dressing, bathing, grooming, feeding, occasional lifting of child), light effort, general	2
									05186	Home activities: child care, standing (e.g. dressing, bathing, grooming, feeding, occasional lifting of child), moderate effort	3
		071114	Giving personal care to children			2	yes	no	05185	Home activities: child care, sitting/kneeling (e.g. dressing, bathing, grooming, feeding, occasional lifting of child), light effort, general	2
									05186	Home activities: child care, standing (e.g. dressing, bathing, grooming, feeding, occasional lifting of child), moderate effort	3
									05183	Home activities: standing, holding child	2
									05188	Home activities: reclining with baby	1.5
		071115	Giving medical/health-care to children	412	Providing medical care to children	2	yes	no	05185	Home activities: child care, sitting/kneeling (e.g. dressing, bathing, grooming, feeding, occasional lifting of child), light effort, general	2
									05186	Home activities: child care, standing (e.g. dressing, bathing, grooming, feeding, occasional lifting of child), moderate effort	3
									05183	Home activities: standing, holding child	2
		071119	Other specified physical care of children			2	yes	no
		07111x	Caring for children/physical care n.f.d.			2	yes	no
	07112		Teaching, training, helping children			2.2	yes	no
		071121	Teaching children			3	yes	no	21070	Volunteer activities: walk/stand combination, for volunteer purposes	3
									05175	Home activities: walking/running, playing with child(ren), moderate effort, only active periods	3.5
									21015	Volunteer activities: standing, light work (filing, talking, assembling)	2.3
		071122	Reading, playing and talking with children			2.2	yes	no	05170	Home activities: sitting, playing with child(ren), light effort, only active periods	2.2
									05171	Home activities: standing, playing with child(ren), light effort, only active periods	2.8
									05175	Home activities: walking/running, playing with child(ren), moderate effort, only active periods	3.5
									05180	Home activities: walking/running, playing with child(ren), vigorous effort, only active periods	5.8
									07070	Inactivity quiet/light: reclining, reading	1.3
									09055	Miscellaneous: sitting, talking in person, on the phone, computer, or text messaging, light effort	1.5
									09030	Miscellaneous: sitting, reading, book, newspaper, etc.	1.3
		071123	Giving emotional support to children			1.75	yes	yes	09055	Miscellaneous: sitting, talking in person, on the phone, computer, or text messaging, light effort	1.5
									05183	Home activities: standing, holding child	2
		071129	Other specified teaching, training, helping activities			2.2	yes	no
	07113		Accompanying children to places	442	Accompanying own children	1.8	yes	no
		071131	Accompanying children to receive personal services			1.8	yes	no	09050	Miscellaneous: standing, talking in person, on the phone, computer, or text messaging, light effort	1.8
									21000	Volunteer activities: sitting, meeting, general, and/or with talking involved	1.5
									17161	Walking: walking from house to car or bus, from car or bus to go places, from car or bus to and from the worksite	2.5
		071132	Accompanying children to receive medical/health services			1.8	yes	no	09050	Miscellaneous: standing, talking in person, on the phone, computer, or text messaging, light effort	1.8
									21000	Volunteer activities: sitting, meeting, general, and/or with talking involved	1.5
									17161	Walking: walking from house to car or bus, from car or bus to go places, from car or bus to and from the worksite	2.5
		071133	Accompanying children to school, day-care centres			1.8	yes	no	09050	Miscellaneous: standing, talking in person, on the phone, computer, or text messaging, light effort	1.8
									21000	Volunteer activities: sitting, meeting, general, and/or with talking involved	1.5
									17161	Walking: walking from house to car or bus, from car or bus to go places, from car or bus to and from the worksite	2.5
		071134	Accompanying children to sports, lessons etc.			1.8	yes	no	09050	Miscellaneous: standing, talking in person, on the phone, computer, or text messaging, light effort	1.8
									09115	Miscellaneous: sitting at a sporting event, spectator	1.5
									21070	Volunteer activities: walk/stand combination, for volunteer purposes	3
		071135	Taking children on excursions, museum visits and similar outings; coordinating or facilitating child’s social or non-school activities			2	yes	no	09106	Miscellaneous: touring/traveling/vacation involving walking	3.5
									09105	Miscellaneous: touring/traveling/vacation involving riding in a vehicle	2
									09115	Miscellaneous: sitting at a sporting event, spectator	1.5
									05183	Home activities: standing, holding child	2
		071139	Accompanying children to other specified places			1.8	yes	no
		07113x	Accompanying children to places n.f.d.			1.8	yes	no
	07114	071140	Minding children (passive care)	416	Minding children (passive care)	1.3	yes	yes	07070	Inactivity quiet/light: reclining, reading	1.3
				425	Passive care of dependent adult				07021	Inactivity quiet/light: sitting quietly, general	1.3
									07040	Inactivity quiet/light: standing quietly, standing in a line	1.3
0712			Adult care			2.4	yes	no
	07121		Caring for adults/physical care			3	yes	no
		071211	Giving personal care to adults	421	Assisting dependent adults with tasks of daily living	3	yes	no	05200	Home activities: elder care, disabled adult, bathing, dressing, moving into and out of bed, only active periods	4
									05205	Home activities: elder care, disabled adult, feeding, combing hair, light effort, only active periods	2.3
									21070	Volunteer activities: walk/stand combination, for volunteer purposes	3
		071212	Giving medical/health-care to adults	422	Assisting dependent adults with medical care	3	yes	no	11610	Occupation: standing, light/moderate effort (e.g. assemble/repair heavy parts, welding, stocking parts, auto repair, standing, packing boxes, nursing patient care)	3
				431	Feeding, cleaning, physical care for non-dependent adult household and family members including for temporary illness				21070	Volunteer activities: walk/stand combination, for volunteer purposes	3
									13036	Self care: taking medication, sitting or standing	1.5
									05200	Home activities: elder care, disabled adult, bathing, dressing, moving into and out of bed, only active periods	4
									05205	Home activities: elder care, disabled adult, feeding, combing hair, light effort, only active periods	2.3
		071219	Other specified physical care of adults	429	Other activities related to care for dependent adults	3	yes	no
		07121x	Caring for adults/physical care n.f.d.	439	Other activities related to care for non-dependent adult household and family members	3	yes	no
	07122	071220	Caring for adults/emotional support			1.5	yes	yes	09055	Miscellaneous: sitting, talking in person, on the phone, computer, or text messaging, light effort	1.5
	07123		Accompanying adults to places	443	Accompanying dependent adults	2.4	yes	no
				444	Accompanying non-dependent adult household and family members
		071231	Accompanying adults to receive personal services			2.5	yes	no	17105	Walking: pushing a wheelchair, non-occupational	3.8
									17070	Walking: descending stairs	3.5
									17133	Walking: stair climbing, slow pace	4
									17151	Walking: walking, less than 2 mph, level, strolling, very slow	2
									17161	Walking: walking from house to car or bus, from car or bus to go places, from car or bus to and from the worksite	2.5
									07021	Inactivity quiet/light: sitting quietly, general	1.3
									07040	Inactivity quiet/light: standing quietly, standing in a line	1.3
		071232	Accompanying adults to receive medical/health services			2.5	yes	no	17105	Walking: pushing a wheelchair, non-occupational	3.8
									17070	Walking: descending stairs	3.5
									17133	Walking: stair climbing, slow pace	4
									17151	Walking: walking, less than 2 mph, level, strolling, very slow	2
									17161	Walking: walking from house to car or bus, from car or bus to go places, from car or bus to and from the worksite	2.5
									07021	Inactivity quiet/light: sitting quietly, general	1.3
									07040	Inactivity quiet/light: standing quietly, standing in a line	1.3
		071233	Accompanying adults for shopping			2.4	yes	no	17105	Walking: pushing a wheelchair, non-occupational	3.8
									05060	Home activities: food shopping with or without a grocery cart, standing or walking	2.3
									05065	Home activities: non-food shopping with or without a grocery cart, standing or walking	2.3
									17161	Walking: walking from house to car or bus, from car or bus to go places, from car or bus to and from the worksite	2.5
		071234	Accompanying adults to social activities			2.25	yes	no	17105	Walking: pushing a wheelchair, non-occupational	3.8
									09100	Miscellaneous: retreat/family reunion activities involving sitting, relaxing, talking, eating	1.8
									17151	Walking: walking, less than 2 mph, level, strolling, very slow	2
									17161	Walking: walking from house to car or bus, from car or bus to go places, from car or bus to and from the worksite	2.5
		071235	Accompanying adults to cultural, sports and entertainment venues			2.25	yes	no	17105	Walking: pushing a wheelchair, non-occupational	3.8
									09105	Miscellaneous: touring/traveling/vacation involving riding in a vehicle	2
									09106	Miscellaneous: touring/traveling/vacation involving walking	3.5
									17151	Walking: walking, less than 2 mph, level, strolling, very slow	2
									17161	Walking: walking from house to car or bus, from car or bus to go places, from car or bus to and from the worksite	2.5
									09115	Miscellaneous: sitting at a sporting event, spectator	1.5
		071239	Accompanying adults to other specified places			2.4	yes	no
		07123x	Accompanying adults to places n.f.d.			2.4	yes	no
071x			Working time providing unpaid caregiving services to household members n.f.d.			2	yes	no
0720			Travel related to unpaid caregiving services to household members			n/a	yes	n/a
	07200	072000	Travel related to unpaid caregiving services to household members			n/a	yes	n/a
0790			Providing unpaid caregiving services to household members n.e.c.			2	yes	no
	07900	079000	Providing unpaid caregiving services to household members n.e.c.	490	Other activities related to unpaid caregiving services for household and family members	2	yes	no
n.f.d. : Not Further Defined
n.e.c : Not Elsewhere Classified

## Sheet: 08 community service
ICATUS 2005				ICATUS 2016		Summary METs	Wakefulness (Yes/No)	Sitting/reclining/lying (Yes/No)	Compendium
Code			Description	Code	Description				Code	Major heading: specific activities	METs
0811			Unpaid help to other households			2.5	yes	no
	08111		Household maintenance and management as help to other households			2.4	yes	no
		081111	Preparing and serving meals as help to other households			2.5	yes	no	05049	Home activities: cooking or food preparation, moderate effort	3.5
									05050	Home activities: cooking or food preparation - standing or sitting or in general (not broken into stand/walk components), manual appliances, light effort	2
									05051	Home activities: serving food, setting table, implied walking or standing	2.5
									05052	Home activities: cooking or food preparation, walking	2.5
		081112	Cleaning and upkeep as help to other households			3.3	yes	no	05010	Home activities: cleaning, sweeping carpet or floors, general	3.3
									05020	Home activities: cleaning, heavy or major (e.g. wash car, wash windows, clean garage), moderate effort	3.5
									05021	Home activities: cleaning, mopping, standing, moderate effort	3.5
									05022	Home activities: cleaning windows, washing windows, general	3.2
									05023	Home activities: mopping, standing, light effort	2.5
									05024	Home activities: polishing floors, standing, walking slowly, using electric polishing machine	4.5
									05030	Home activities: cleaning, house or cabin, general, moderate effort	3.3
									05032	Home activities: dusting or polishing furniture, general	2.3
									05035	Home activities: kitchen activity, general (e.g. cooking, washing dishes, cleaning up), moderate effort	3.3
									05040	Home activities: cleaning, general (straightening up, changing linen, carrying out trash), light effort	2.5
									05041	Home activities: wash dishes, standing or in general (not broken into stand/walk components)	1.8
									05042	Home activities: wash dishes, clearing dishes from table, walking, light effort	2.5
									05043	Home activities: vacuuming, general, moderate effort	3.3
		081113	Care of textiles as help to other households			2.3	yes	no	05070	Home activities: ironing	1.8
									05090	Home activities: laundry, fold or hang clothes, put clothes in washer or dryer, packing suitcase, washing clothes by hand, implied standing, light effort	2
									05092	Home activities: laundry, hanging wash, washing clothes by hand, moderate effort	4
									05095	Home activities: laundry, putting away clothes, gathering clothes to pack, putting away laundry, implied walking	2.3
									11730	Occupation: tailoring, general	2.5
									11763	Occupation: tailoring, weaving, light effort (e.g. finishing operations, washing, dyeing, inspecting cloth, counting yards, paperwork)	2
									11765	Occupation: tailoring, weaving, moderate effort (e.g. spinning and weaving operations, delivering boxes of yam to spinners, loading of warp bean, pinwinding, conewinding, warping, cloth cutting)	4
		081114	Household management as help to other households			2.3	yes	no	21005	Volunteer activities: sitting, light office work, in general	1.5
									21015	Volunteer activities: standing, light work (filing, talking, assembling)	2.3
									21070	Volunteer activities: walk/stand combination, for volunteer purposes	3
		081115	Pet care as help to other households			2.4	yes	no	05053	Home activities: feeding household animals	2.5
									05197	Home activities: animal care, household animals, general	2.3
		081119	Other specified help to other households			2.4	yes	no
		08111x	Household maintenance and management as help to other households n.f.d.			2.4	yes	no
	08112		Shopping for/purchasing of goods and services as help to other households	512	Unpaid volunteer shopping/purchasing goods and services	2.05	yes	no
		081121	Shopping for/purchasing of goods as help			2.3	yes	no	05060	Home activities: food shopping with or without a grocery cart, standing or walking	2.3
									05065	Home activities: non-food shopping with or without a grocery cart, standing or walking	2.3
		081122	Shopping for/purchasing of services as help			1.8	yes	no	05065	Home activities: non-food shopping with or without a grocery cart, standing or walking	2.3
									09050	Miscellaneous: standing, talking in person, on the phone, computer, or text messaging, light effort	1.8
									09055	Miscellaneous: sitting, talking in person, on the phone, computer, or text messaging, light effort	1.5
		081129	Other specified shopping/purchasing as help			2.05	yes	no
		08112x	Shopping for/purchasing of goods and services as help to other households n.f.d.			2.05	yes	no
	08113	081130	Construction, renovation and repairs of dwellings and other structures as help to other households			4	yes	no	06127	Home repair: home repair, general, moderate effort	4.5
									06128	Home repair: home repair, general, vigorous effort	6
									06072	Home repair: carpentry, home remodeling tasks, moderate effort	4
									06074	Home repair: carpentry, home remodeling tasks, light effort	2.3
									11120	Occupation: construction, outside, remodeling, new structures (e.g. roof repair, miscellaneous)	4
	08114	081140	Repairs of consumer and household goods as help to other households			2.75	yes	no	06126	Home repair: home repair, general, light effort	2.5
									06144	Home repair: repairing appliances	3
	08115	081150	Unpaid help in business/farm and employment as help to other households	515	Unpaid volunteer unpaid help in enterprises owned by other households	2.3	yes	no	21005	Volunteer activities: sitting, light office work, in general	1.5
									21015	Volunteer activities: standing, light work (filing, talking, assembling)	2.3
									21070	Volunteer activities: walk/stand combination, for volunteer purposes	3
	08116	081160	Childcare as help to other households			2.5	yes	no	05184	Home activities: child care, infant, general	2.5
									05185	Home activities: child care, sitting/kneeling (e.g. dressing, bathing, grooming, feeding, occasional lifting of child), light effort, general	2
									05186	Home activities: child care, standing (e.g. dressing, bathing, grooming, feeding, occasional lifting of child), moderate effort	3
	08117	081170	Adult care as help to other households			3.15	yes	no	05200	Home activities: elder care, disabled adult, bathing, dressing, moving into and out of bed, only active periods	4
									05205	Home activities: elder care, disabled adult, feeding, combing hair, light effort, only active periods	2.3
	08118	081180	Transportation assistance to other households			2.5	yes	yes	16010	Transportation: automobile or light truck (not a semi) driving	2.5
0812			Community-organized services			2.2	yes	no
	08121	081210	Community organized work: cooking for collective celebrations etc.	522	Unpaid volunteer preparing/serving meals, cleaning up	2.5	yes	no	05049	Home activities: cooking or food preparation, moderate effort	3.5
									05050	Home activities: cooking or food preparation - standing or sitting or in general (not broken into stand/walk components), manual appliances, light effort	2
									05052	Home activities: cooking or food preparation, walking	2.5
	08122	081220	Work on road/building repair, clearing and preparing community land, cleaning (streets, markets etc.)	521	Unpaid volunteer work on road/building repair, clearing and preparing land, cleaning (streets, markets, etc.), and construction	4.75	yes	no	11030	Occupation: building road, driving heavy machinery	6
									11035	Occupation: building road, directing traffic, standing	2
									08030	Lawn and garden: clearing brush/land, undergrowth, or ground, hauling branches, wheelbarrow chores, vigorous effort	6.3
									05020	Home activities: cleaning, heavy or major (e.g. wash car, wash windows, clean garage), moderate effort	3.5
	08123	081230	Organizing and work on community-based assistance to villages, other sublocations			1.9	yes	yes	21000	Volunteer activities: sitting, meeting, general, and/or with talking involved	1.5
									21015	Volunteer activities: standing, light work (filing, talking, assembling)	2.3
									21035	Volunteer activities: typing, electric, manual, or computer	1.3
									21070	Volunteer activities: walk/stand combination, for volunteer purposes	3
	08124	081240	Organizing and work on community-based assistance to families and individuals			1.9	yes	yes	21000	Volunteer activities: sitting, meeting, general, and/or with talking involved	1.5
									21015	Volunteer activities: standing, light work (filing, talking, assembling)	2.3
									21035	Volunteer activities: typing, electric, manual, or computer	1.3
									21070	Volunteer activities: walk/stand combination, for volunteer purposes	3
0813			Organized unpaid volunteer services			2.65	yes	no
	08131	081310	Volunteer work for organizations (not directly for individuals)	524	Unpaid volunteer office/administrative work	2.3	yes	yes	21005	Volunteer activities: sitting, light office work, in general	1.5
									21015	Volunteer activities: standing, light work (filing, talking, assembling)	2.3
									21070	Volunteer activities: walk/stand combination, for volunteer purposes	3
	08132	081320	Volunteer work through organizations (extended directly to individuals)	523	Unpaid volunteer cultural activities, recreation and sports activities	3	yes	no	16010	Transportation: automobile or light truck (not a semi) driving	2.5
									21070	Volunteer activities: walk/stand combination, for volunteer purposes	3
									15140	Sports: coaching, football, soccer, basketball, baseball, swimming, etc.	4
									11580	Occupation: sitting tasks, light effort (e.g. office work, chemistry lab work, computer work, light assembly repair, watch repair, reading, desk work)	1.5
									11600	Occupation: standing tasks, light effort (e.g. bartending, store clerk, assembling, filing, duplicating, librarian, putting up a Christmas tree, standing and talking at work, changing clothes when teaching physical education, standing)	3
									11610	Occupation: standing, light/moderate effort (e.g. assemble/repair heavy parts, welding, stocking parts, auto repair, standing, packing boxes, nursing patient care)	3
081x			Working time providing community services and help to other households n.f.d.	519	Other activities related to direct unpaid volunteering for other households	2.5	yes	no
				529	Other activities related to community- and organization-based unpaid volunteering
0820			Attendance in meetings			1.5	yes	yes
	08200	082000	Attendance in meetings			1.5	yes	yes	09055	Miscellaneous: sitting, talking in person, on the phone, computer, or text messaging, light effort	1.5
									09060	Miscellaneous: sitting, studying, general, including reading and/or writing, light effort	1.3
									09065	Miscellaneous: sitting, in class, general, including note-taking or class discussion	1.8
0830			Other community services			2.3	yes	no
	08300		Involvement in civic and related responsibilities	730	Involvement in civic and related responsibilities	2.3	yes	no
		083001	Attending civic ceremonies			2	yes	no	20000	Religious activities: sitting in church, in service, attending a ceremony, sitting quietly	1.3
									20005	Religious activities: sitting in church, talking or singing, attending a ceremony, sitting, active participation	1.8
									20015	Religious activities: standing quietly in church, attending a ceremony	1.3
									20020	Religious activities: standing, singing in church, attending a ceremony, standing, active participation	2
									20035	Religious activities: walking in church	2
									20039	Religious activities: walk/stand combination for religious purposes, usher	2
									20040	Religious activities: praise with dance or run, spiritual dancing in church	5
		083002	Attending to civic obligations			2.3	yes	no	21070	Volunteer activities: walk/stand combination, for volunteer purposes	3
									21000	Volunteer activities: sitting, meeting, general, and/or with talking involved	1.5
									21015	Volunteer activities: standing, light work (filing, talking, assembling)	2.3
		083009	Other specified involvement in civic and related responsibilities			2.3	yes	no	21070	Volunteer activities: walk/stand combination, for volunteer purposes	3
									21000	Volunteer activities: sitting, meeting, general, and/or with talking involved	1.5
									21015	Volunteer activities: standing, light work (filing, talking, assembling)	2.3
		08300x	Involvement in civic and related responsibilities n.f.d.			2.3	yes	no
0840			Travel related to community services and help to other households			n/a	yes	n/a
	08400	084000	Travel related to community services and help to other households			n/a	yes	n/a
0890			Community services and help to other households n.e.c.			2.45	yes	no
	08900	089000	Community services and help to other households n.e.c.	590	Other unpaid work activities	2.45	yes	no
n.f.d. : Not Further Defined
n.e.c : Not Elsewhere Classified

## Sheet: 09 learning
ICATUS 2005				ICATUS 2016		Summary METs	Wakefulness (Yes/No)	Sitting/reclining/lying (Yes/No)	Compendium
Code			Description	Code	Description				Code	Major heading: specific activities	METs
0911			General education			1.65	yes	yes
	09111		School/university attendance			2.15	yes	yes
		091111	Attending class/lecture including taking examinations	611	School/university attendance	1.3	yes	yes	09040	Miscellaneous: sitting, writing, desk work, typing	1.3
									09060	Miscellaneous: sitting, studying, general, including reading and/or writing, light effort	1.3
									09065	Miscellaneous: sitting, in class, general, including note-taking or class discussion	1.8
		091112	Engaging in co-curricular and extra-curricular activities	612	Extra-curricular activities	3	yes	no	11870	Occupation: working in scene shop, theater actor, backstage employee	3
									20020	Religious activities: standing, singing in church, attending a ceremony, standing, active participation	2
									20040	Religious activities: praise with dance or run, spiritual dancing in church	5
									15138	Sports: cheerleading, gymnastic moves, competitive	6
									21035	Volunteer activities: typing, electric, manual, or computer	2
		091119	Other specified activities related to school/university attendance			2.15	yes	yes
		09111x	School/university attendance n.f.d.	619	Other activities related to formal education	2.15	yes	yes
	09112	091120	Breaks/waiting at place of general education	613	Breaks at place of formal education	1.65	yes	no	17270	Walking: walking, to work or class (Taylor Code 015)	4
									07021	Inactivity quiet/light: sitting quietly, general	1.3
									09050	Miscellaneous: standing, talking in person, on the phone, computer, or text messaging, light effort	1.8
									09055	Miscellaneous: sitting, talking in person, on the phone, computer, or text messaging, light effort	1.5
	09113	091130	Self-study for distance education course work (video, audio, online)	614	Self-study for distance education course work (video, audio, online)	1.3	yes	yes	07020	Inactivity quiet/light: sitting quietly and watching television	1.3
									09055	Miscellaneous: sitting, talking in person, on the phone, computer, or text messaging, light effort	1.5
									09060	Miscellaneous: sitting, studying, general, including reading and/or writing, light effort	1.3
0912			Homework, course review, research related to general education			1.4	yes	yes
	09120	091200	Homework, course review, research related to general education	620	Homework, being tutored, course review, research and activities related to formal education	1.4	yes	yes	09060	Miscellaneous: sitting, studying, general, including reading and/or writing, light effort	1.3
									09055	Miscellaneous: sitting, talking in person, on the phone, computer, or text messaging, light effort	1.5
0913			Additional study, non-formal education and courses during free time			1.4	yes	yes
	09130	091300	Additional study, non-formal education and courses during free time	630	Additional study, non-formal education and courses	1.4	yes	yes	09060	Miscellaneous: sitting, studying, general, including reading and/or writing, light effort	1.3
									09055	Miscellaneous: sitting, talking in person, on the phone, computer, or text messaging, light effort	1.5
0914			Career/professional development training and studies			1.65	yes	yes
	09140	091400	Career/professional development training and studies			1.65	yes	yes	09060	Miscellaneous: sitting, studying, general, including reading and/or writing, light effort	1.3
									09065	Miscellaneous: sitting, in class, general, including note-taking or class discussion	1.8
									09050	Miscellaneous: standing, talking in person, on the phone, computer, or text messaging, light effort	1.8
									09055	Miscellaneous: sitting, talking in person, on the phone, computer, or text messaging, light effort	1.5
091x			Learning n.f.d.			1.525	yes	yes
0920			Other activities carried out in relation to learning activities			2	yes	no
	09200	092000	Other activities carried out in relation to learning activities	690	Other activities related to learning	2	yes	no	11796	Occupation: walking, gathering things at work, ready to leave	3
									05050	Home activities: cooking or food preparation - standing or sitting or in general (not broken into stand/walk components), manual appliances, light effort	2
									09055	Miscellaneous: sitting, talking in person, on the phone, computer, or text messaging, light effort	1.5
0930			Travel related to learning			n/a	yes	n/a
	09300	093000	Travel related to learning			n/a	yes	n/a
0990			Learning activities n.e.c.			1.65	yes	yes
	09900	099000	Learning activities n.e.c.			1.65	yes	yes
n.f.d. : Not Further Defined
n.e.c : Not Elsewhere Classified

## Sheet: 10 socializing
ICATUS 2005				ICATUS 2016		Summary METs	Wakefulness (Yes/No)	Sitting/reclining/lying (Yes/No)	Compendium
Code			Description	Code	Description				Code	Major heading: specific activities	METs
1011			Socializing and communication			1.65	yes	yes
	10111		Talking, conversing	711	Talking, conversing, chatting	1.5	yes	yes
		101111	Talking/conversing face to face			1.5	yes	yes	07060	Inactivity quiet/light: reclining, talking or talking on phone	1.3
									09050	Miscellaneous: standing, talking in person, on the phone, computer, or text messaging, light effort	1.8
									09055	Miscellaneous: sitting, talking in person, on the phone, computer, or text messaging, light effort	1.5
		101112	Talking/conversing by telephone, texting, short-wave radio etc			1.5	yes	yes	07060	Inactivity quiet/light: reclining, talking or talking on phone	1.3
									09050	Miscellaneous: standing, talking in person, on the phone, computer, or text messaging, light effort	1.8
									09055	Miscellaneous: sitting, talking in person, on the phone, computer, or text messaging, light effort	1.5
		101113	Cyber-chatting including instant messaging, discussion groups etc.			1.5	yes	yes	07060	Inactivity quiet/light: reclining, talking or talking on phone	1.3
									09050	Miscellaneous: standing, talking in person, on the phone, computer, or text messaging, light effort	1.8
									09055	Miscellaneous: sitting, talking in person, on the phone, computer, or text messaging, light effort	1.5
									21000	Volunteer activities: sitting, meeting, general, and/or with talking involved	1.5
		101119	Other specified activities related to talking/conversing			1.5	yes	yes
		10111x	Talking, conversing n.f.d.			1.5	yes	yes
	10112		Socializing activities	712	Socializing/getting together/gathering activities	1.9	yes	yes
		101121	Doing activities/going to places or events together			2	yes	no	09105	Miscellaneous: touring/traveling/vacation involving riding in a vehicle	2
									09106	Miscellaneous: touring/traveling/vacation involving walking	3.5
									07025	Inactivity quiet/light: sitting, listening to music (not talking or reading) or watching a movie in a theater	1.5
									09115	Miscellaneous: sitting at a sporting event, spectator	1.5
									21070	Volunteer activities: walk/stand combination, for volunteer purposes	3
		101122	Receiving visitors			1.8	yes	yes	09100	Miscellaneous: retreat/family reunion activities involving sitting, relaxing, talking, eating	1.8
									09050	Miscellaneous: standing, talking in person, on the phone, computer, or text messaging, light effort	1.8
		101123	Visiting friends and relatives			1.8	yes	yes	09100	Miscellaneous: retreat/family reunion activities involving sitting, relaxing, talking, eating	1.8
									09050	Miscellaneous: standing, talking in person, on the phone, computer, or text messaging, light effort	1.8
		101124	Hosting parties, receptions, similar gatherings			1.8	yes	yes	09100	Miscellaneous: retreat/family reunion activities involving sitting, relaxing, talking, eating	1.8
									20035	Religious activities: walking in church	2
									09050	Miscellaneous: standing, talking in person, on the phone, computer, or text messaging, light effort	1.8
		101125	Attending parties, receptions, similar gatherings			2	yes	yes	09100	Miscellaneous: retreat/family reunion activities involving sitting, relaxing, talking, eating	1.8
									03040	Dancing: ballroom, slow (e.g., waltz, foxtrot, slow dancing, samba, tango, 19th century dance, mambo, cha cha)	3
									20020	Religious activities: standing, singing in church, attending a ceremony, standing, active participation	2
		101126	Socializing at bars, clubs			2.5	yes	no	07025	Inactivity quiet/light: sitting, listening to music (not talking or reading) or watching a movie in a theater	1.5
									09071	Miscellaneous: standing, miscellaneous	2.5
									03040	Dancing: ballroom, slow (e.g., waltz, foxtrot, slow dancing, samba, tango, 19th century dance, mambo, cha cha)	3
		101129	Other specified socializing activities			1.9	yes	yes
		10112x	Socializing n.f.d.			1.9	yes	yes
	10113	101130	Reading and writing mail	713	Reading and writing mail (including email)	1.3	yes	yes	09040	Miscellaneous: sitting, writing, desk work, typing	1.3
									09060	Miscellaneous: sitting, studying, general, including reading and/or writing, light effort	1.3
	10114	101140	Unsocial/antisocial/negative social activities	719	Other activities related to socializing and communication	1.8	yes	no	07041	Inactivity quiet/light: standing, fidgeting	1.8
									07022	Inactivity quiet/light: sitting quietly, fidgeting, general, fidgeting hands	1.5
									07023	Inactivity quiet/light: sitting, fidgeting feet	1.8
	1011x		Socializing and communication n.f.d.			1.65	yes	yes
1012			Participating in community cultural/social events			1.8	yes	no
	10121	101210	Participating in community celebrations of cultural/historic events	721	Participating in community celebrations of cultural/historic events	1.8	yes	no	21070	Volunteer activities: walk/stand combination, for volunteer purposes	3
									20000	Religious activities: sitting in church, in service, attending a ceremony, sitting quietly	1.3
									20005	Religious activities: sitting in church, talking or singing, attending a ceremony, sitting, active participation	1.8
									20015	Religious activities: standing quietly in church, attending a ceremony	1.3
									20020	Religious activities: standing, singing in church, attending a ceremony, standing, active participation	2
	10122	101220	Participating in community rites/events (non-religious) of weddings, funerals, births and similar rites-of-passage	722	Participating in community rites/events (non-religious) of weddings, funerals, births and similar rites-of-passage	1.8	yes	no	20000	Religious activities: sitting in church, in service, attending a ceremony, sitting quietly	1.3
									20005	Religious activities: sitting in church, talking or singing, attending a ceremony, sitting, active participation	1.8
									20015	Religious activities: standing quietly in church, attending a ceremony	1.3
									20020	Religious activities: standing, singing in church, attending a ceremony, standing, active participation	2
									20039	Religious activities: walk/stand combination for religious purposes, usher	2
									09100	Miscellaneous: retreat/family reunion activities involving sitting, relaxing, talking, eating	1.8
	10123	101230	Participating in community social functions (music, dance etc.)	723	Participating in community social functions (music, dance, etc.)	2	yes	no	07025	Inactivity quiet/light: sitting, listening to music (not talking or reading) or watching a movie in a theater	1.5
									20020	Religious activities: standing, singing in church, attending a ceremony, standing, active participation	2
									03040	Dancing: ballroom, slow (e.g., waltz, foxtrot, slow dancing, samba, tango, 19th century dance, mambo, cha cha)	3
	1012x		Community participation n.f.d.	729	Other activities related to community participation	1.8	yes	no
1020			Travel related to socializing and community participation			n/a	yes	n/a
	10200	102000	Travel related to socializing and community participation			n/a	yes	n/a
1090			Socializing and community participation n.e.c.			1.8	yes	yes
	10900	109000	Socializing and community participation n.e.c.			1.8	yes	yes
n.f.d. : Not Further Defined
n.e.c : Not Elsewhere Classified

[truncated: 8 more sheets: 11 attending events, 12 hobbies, 13 sport participation, 14 media, 15 personal care, combined ICATUS2005, combined ICATUS2016, ICATUS2016_newly assessed]
